# Supplementary material for: Liposomes of α,ε-N,N’-di-stearoyl lysine-derived amide lipid and phospholipid: Incorporation of lipid A-ligand for bacterial targeting and sialic acid as PEGylation alternative for phagocytosis resistance
Source: Research Square preprint supplement (doi:10.21203/rs.3.rs-5411979/v1), 2025-03-24

## **SUPPORT INFORMATION: Part 1 (NMR spectra of synthetic compounds)**

### **Liposomes of $\alpha,\epsilon$ -N,N'-di-stearoyl lysine-derived amide lipid and phospholipid: Incorporation of lipid A-ligand for bacterial targeting and sialic acid as PEGylation alternative for phagocytosis resistance**

Dean Williams,<sup>a</sup> Alissa McAdorey,<sup>b,c</sup> Eric Lei,<sup>a</sup> Greg Harris,<sup>a</sup> Binbing Ling,<sup>a</sup> Debbie Callaghan,<sup>a</sup> Dorothy Fatehi,<sup>a</sup> Angie Verner,<sup>a</sup> Jacqueline Slinn,<sup>a</sup> Maria Moreno,<sup>a</sup> Umar Iqbal,<sup>a</sup> Hui Qian,<sup>d</sup> Hongbin Yan,<sup>b</sup> Wangxue Chen,<sup>a</sup> Wei Zou<sup>a\*</sup>

<sup>a</sup> *Human Health Therapeutic Research Center, National Research Council Canada, 100 Sussex Drive, Ottawa, Ontario, Canada K1A 0R6*

<sup>b</sup> *Department of Chemistry and Centre for Biotechnology, Brock University, 1812 Sir Isaac Brock Way, St. Catharines, Ontario, Canada L2S 3A1*

<sup>c</sup> *Department of Biological Science, Brock University, 1812 Sir Isaac Brock Way, St. Catharines, Ontario, Canada L2S 3A1*

<sup>d</sup> *Nanotechnology Research Center, National Research Council Canada, 11421 Saskatchewan Dr NW, Edmonton, AB T6G 2M9*

$^1\text{H}$  NMR spectrum (500 MHz,  $\text{CDCl}_3$ ) of compound **1**

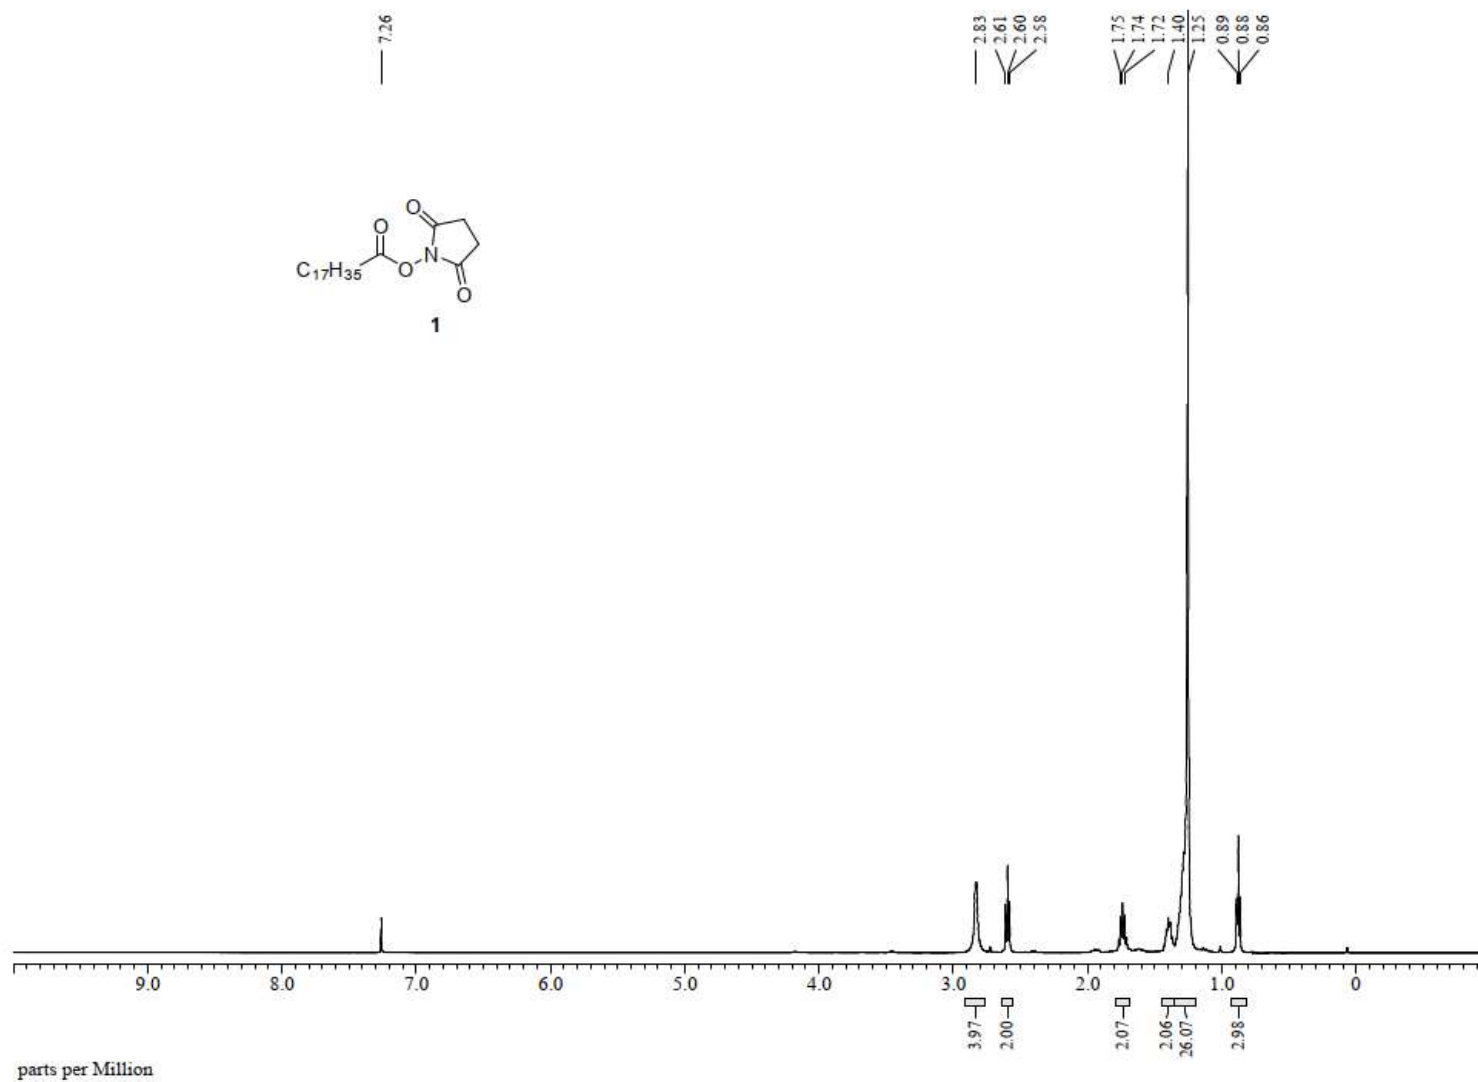

$^{13}\text{C}\{^1\text{H}\}$  NMR spectrum (125 MHz,  $\text{CDCl}_3$ ) of compound **1**

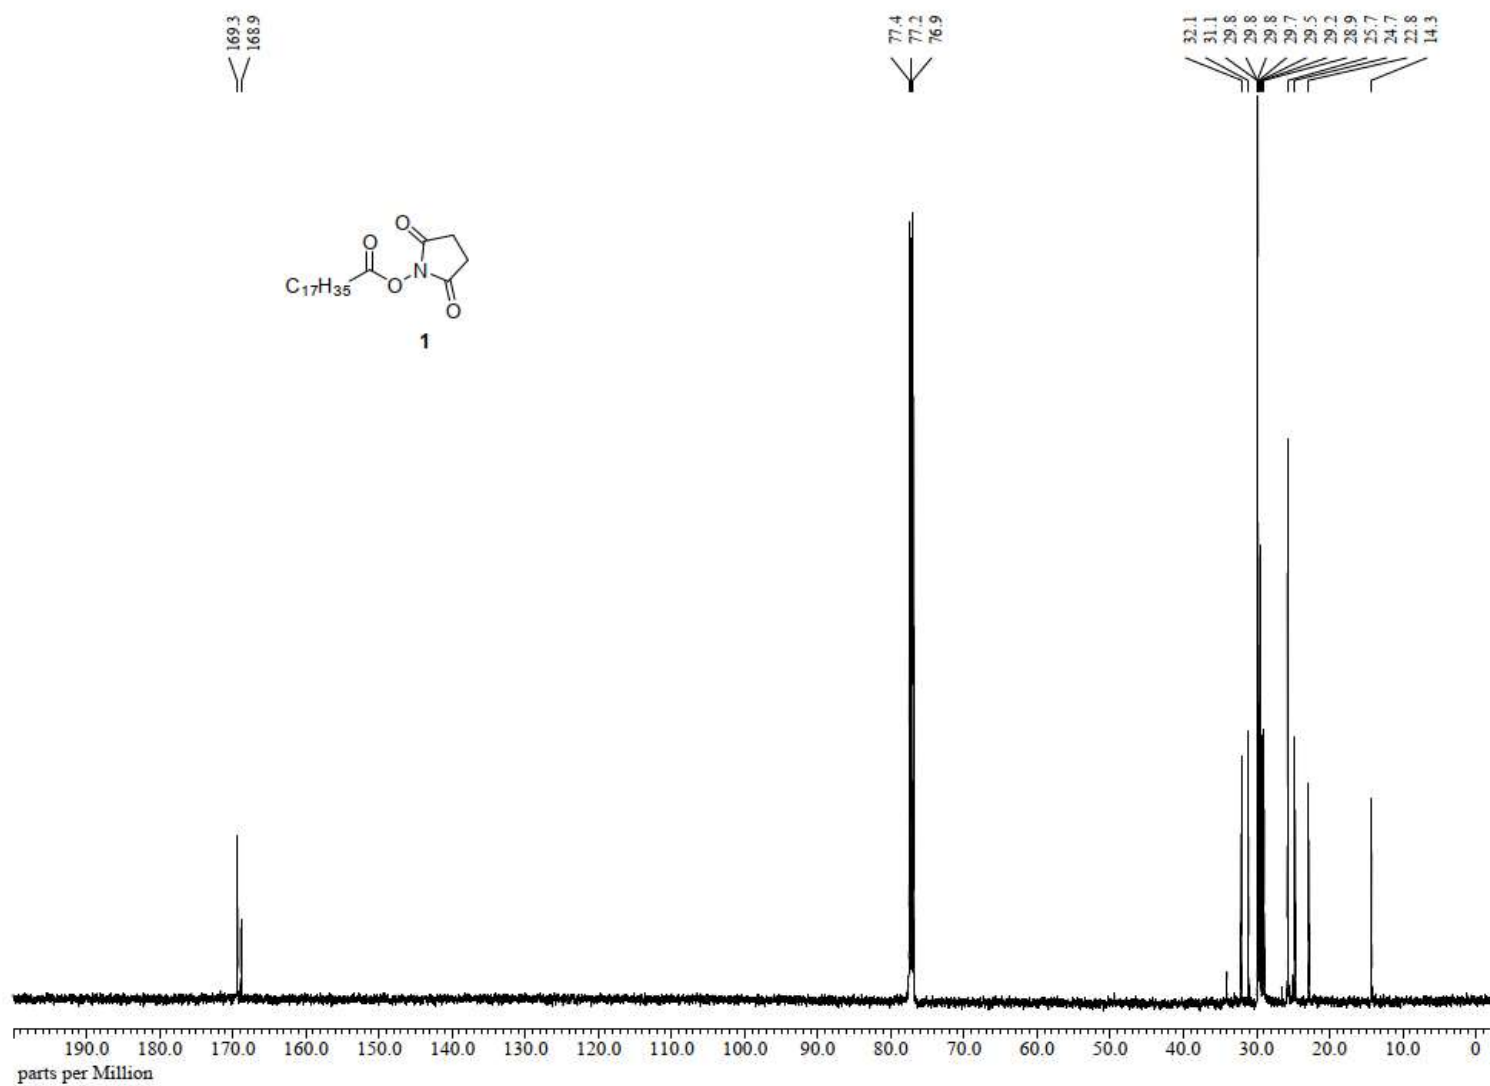

$^1\text{H}$  NMR spectrum (500 MHz, 4:3  $\text{CDCl}_3$ : $\text{CD}_3\text{OD}$ ) of compound **2**

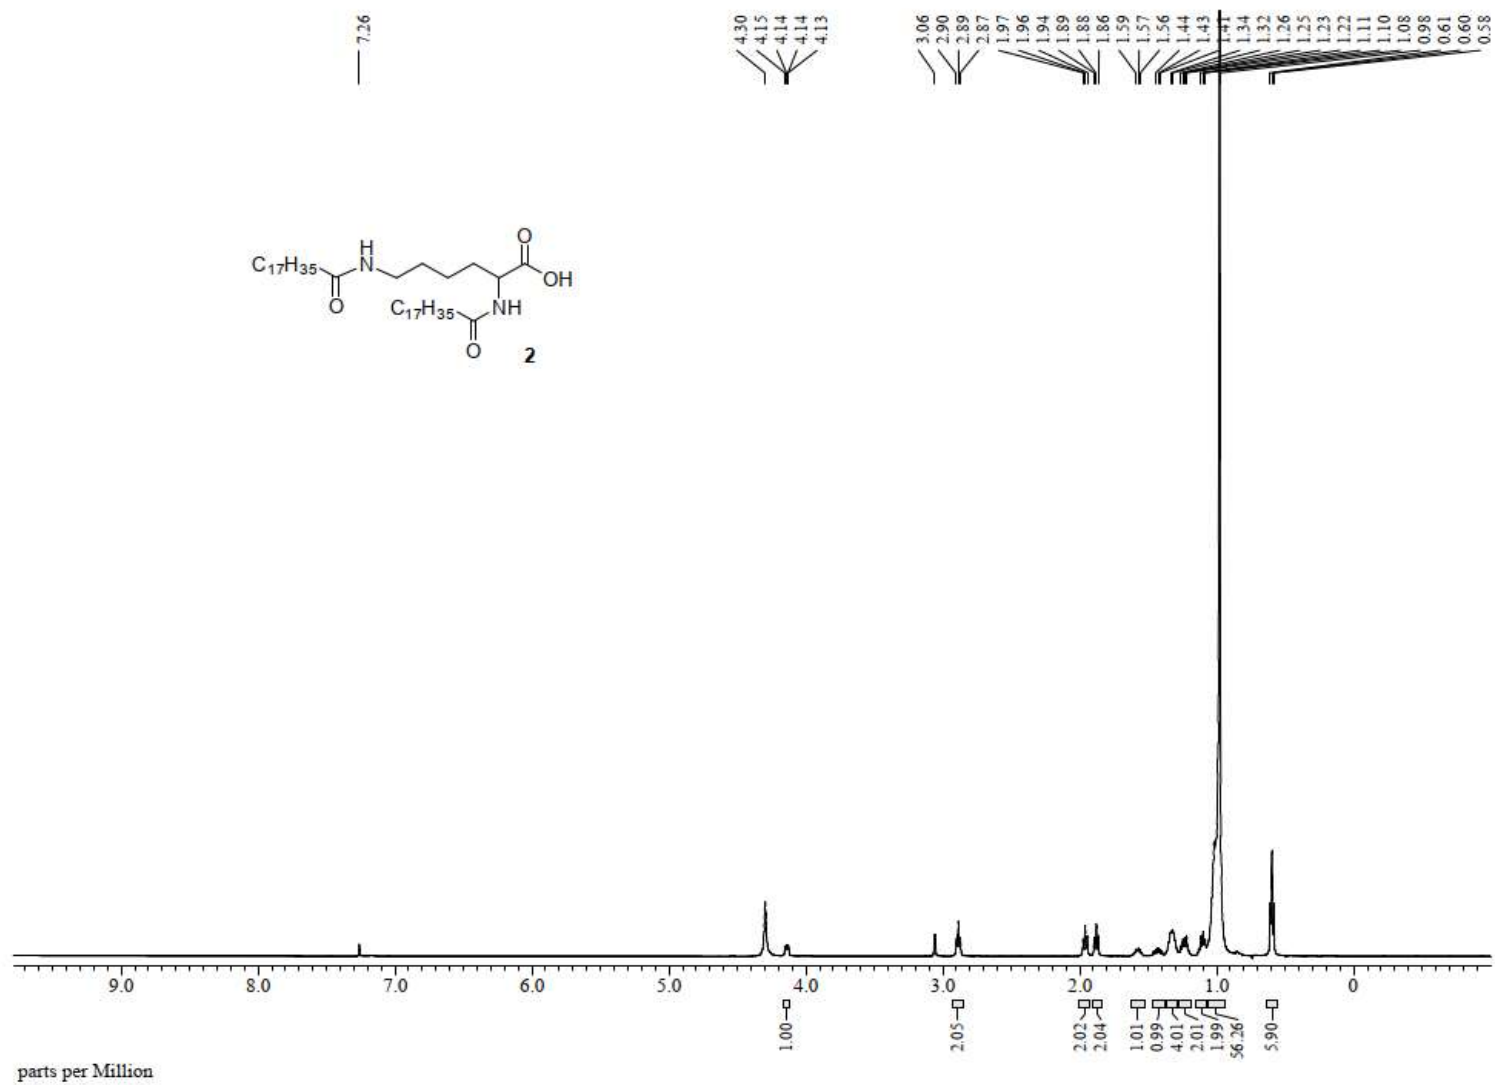

$^{13}\text{C}\{^1\text{H}\}$  NMR spectrum (125 MHz, 4:3  $\text{CDCl}_3:\text{CD}_3\text{OD}$ ) of compound **2**

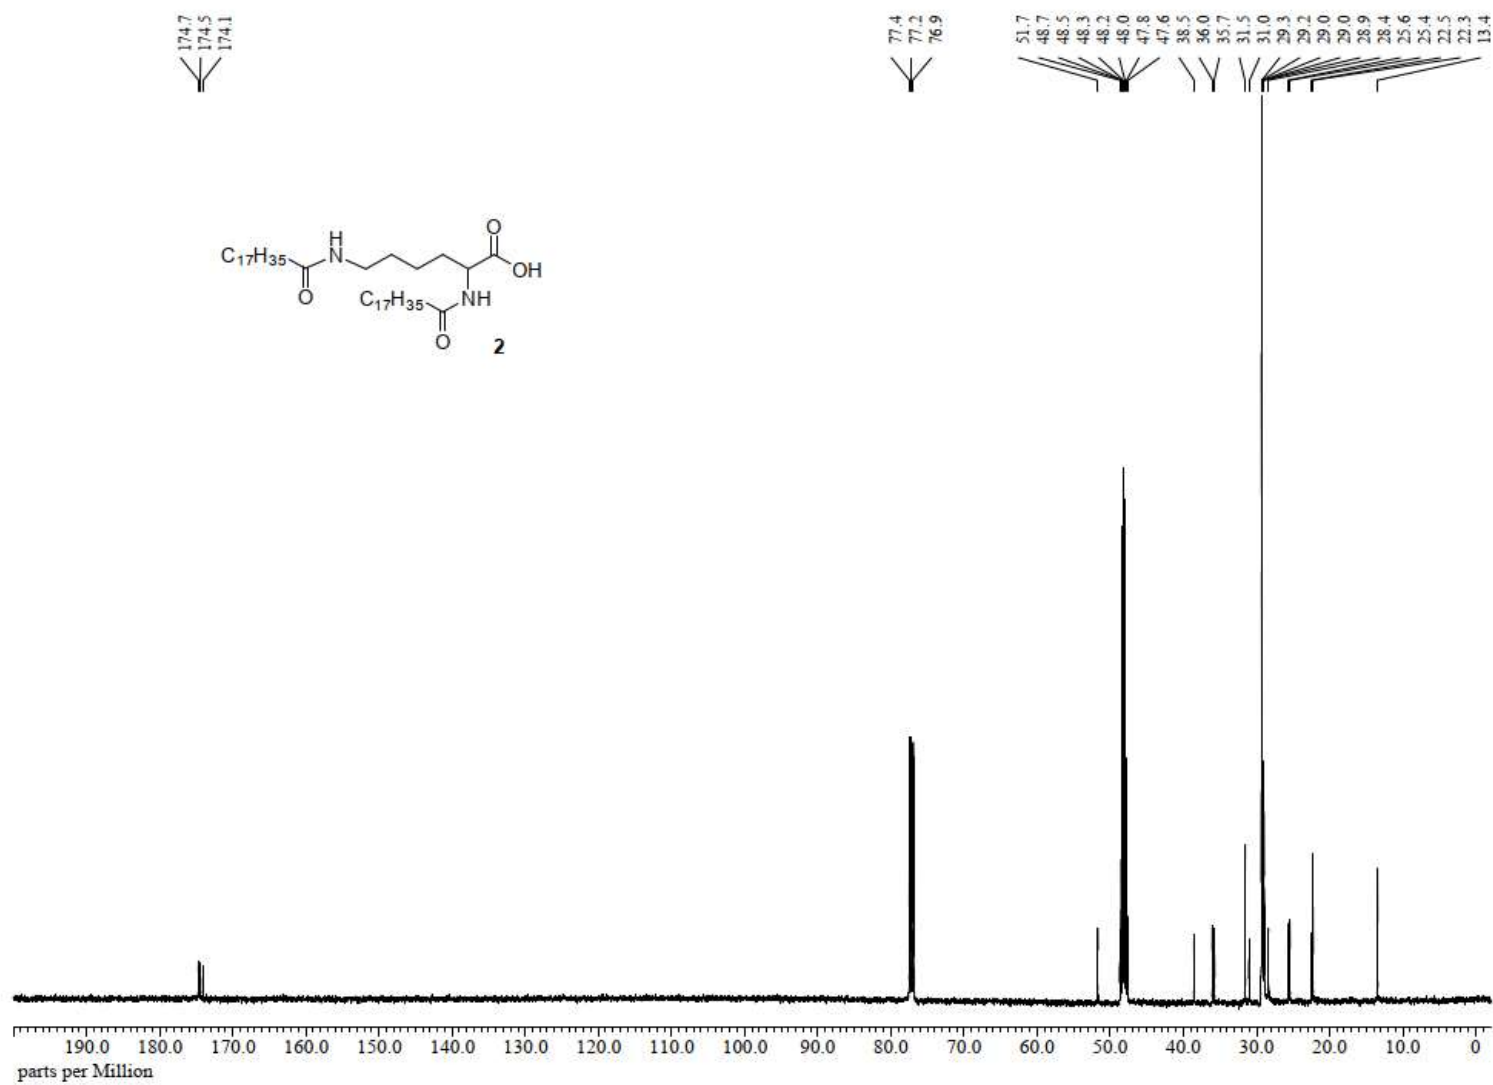

$^1\text{H}$  NMR spectrum (500 MHz,  $\text{CDCl}_3$ ,  $35^\circ\text{C}$ ) of compound **3**

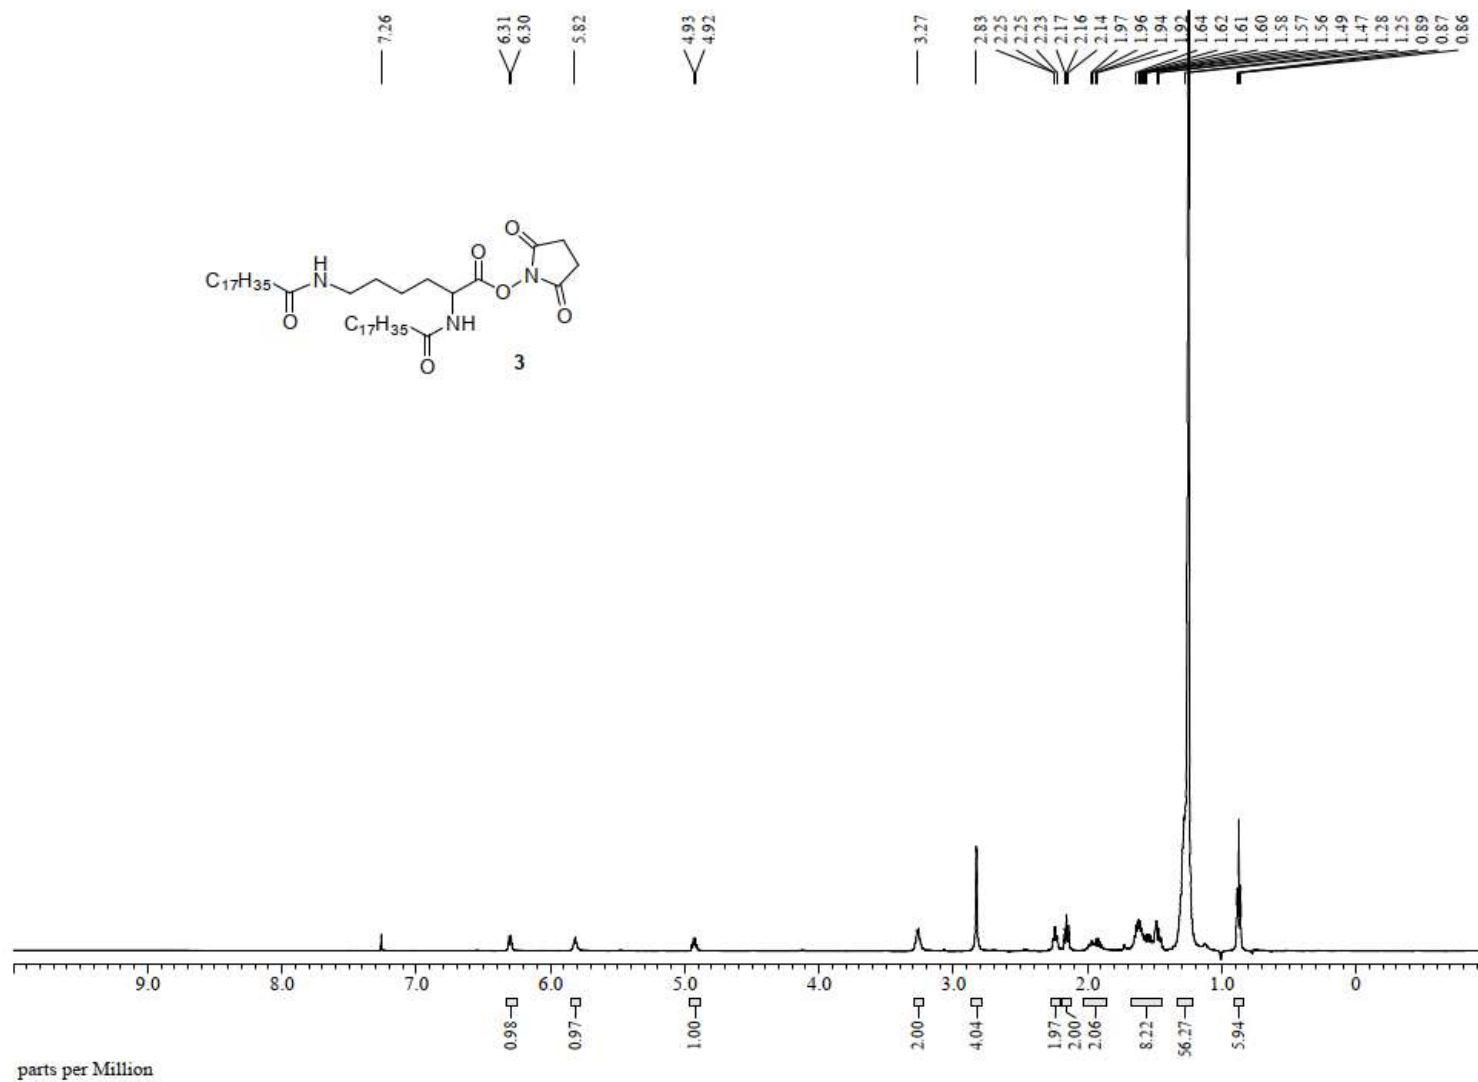

$^{13}\text{C}\{^1\text{H}\}$  NMR spectrum (125 MHz,  $\text{CDCl}_3$ ,  $35^\circ\text{C}$ ) of compound **3**

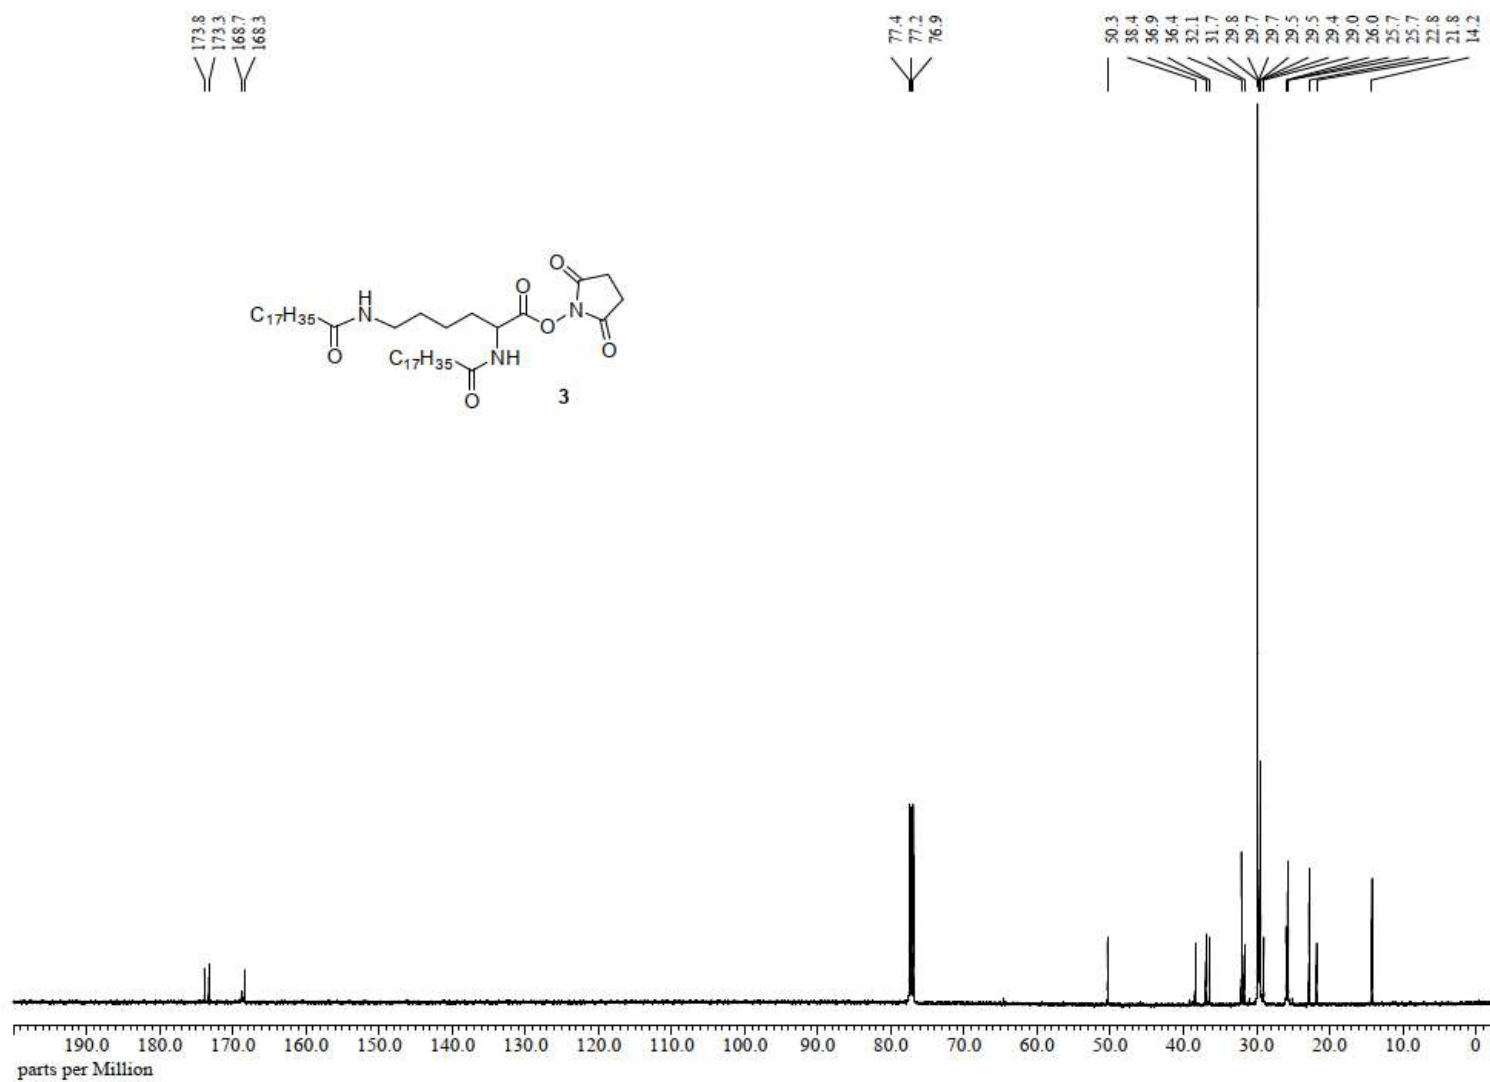

$^1\text{H}$  NMR spectrum (400 MHz, 2:1  $\text{CDCl}_3$ : $\text{CD}_3\text{OD}$ ) of compound **4**

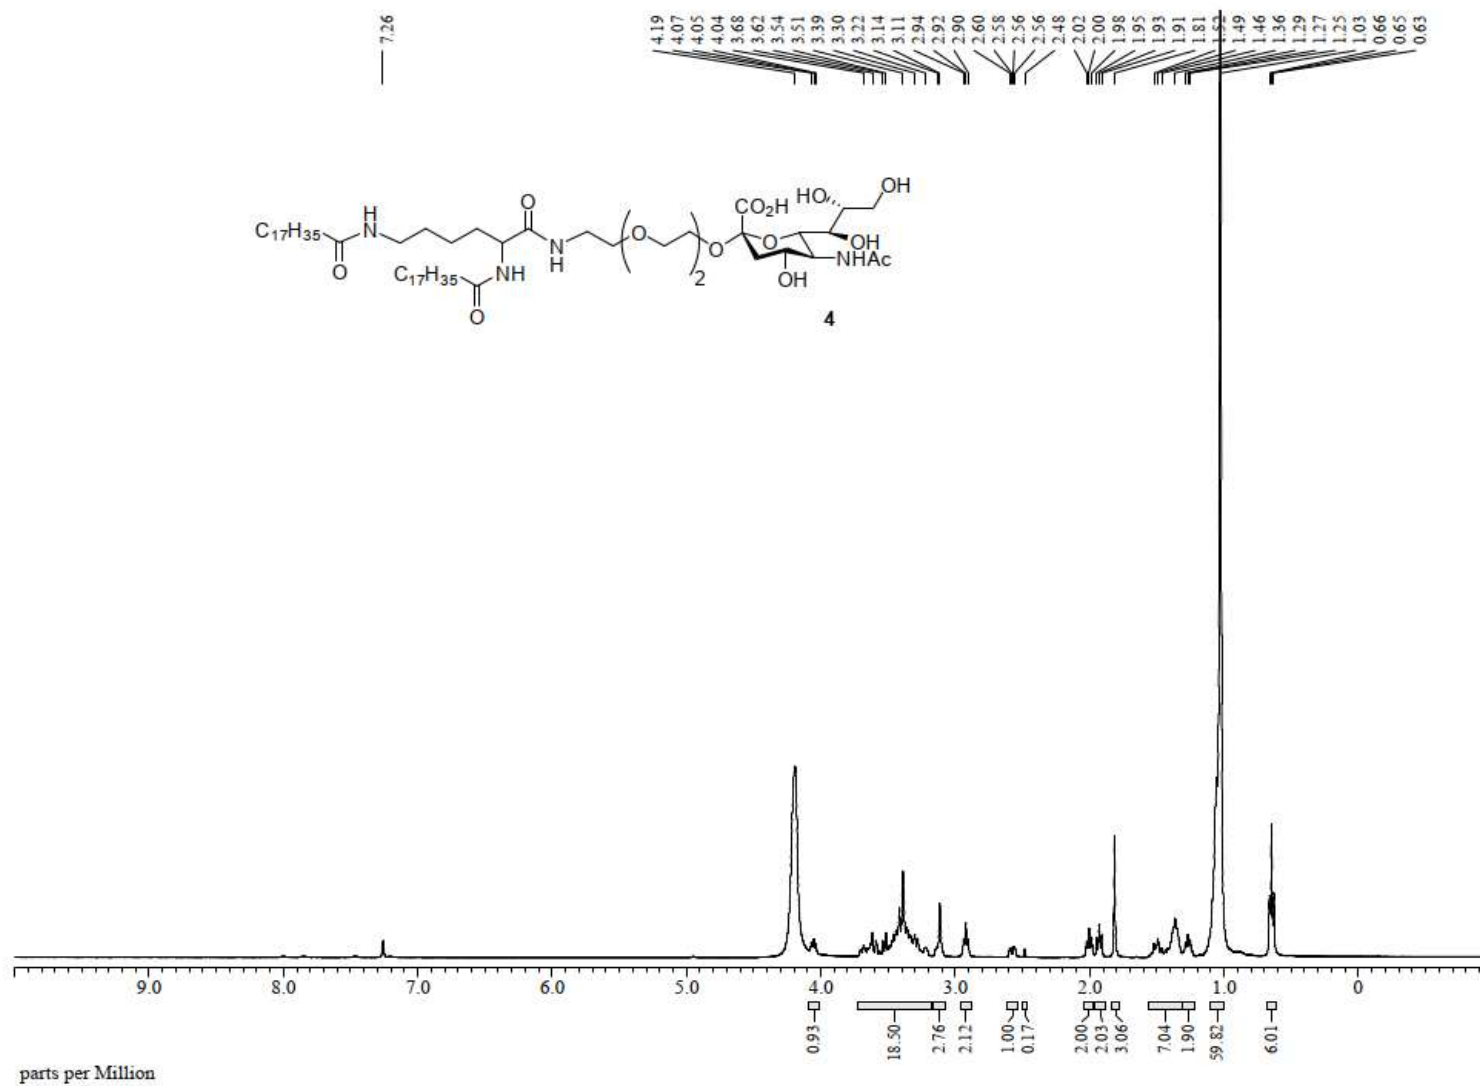



$^{13}\text{C}\{^1\text{H}\}$  NMR spectrum (101 MHz, 2:1  $\text{CDCl}_3:\text{CD}_3\text{OD}$ ) of compound **4**

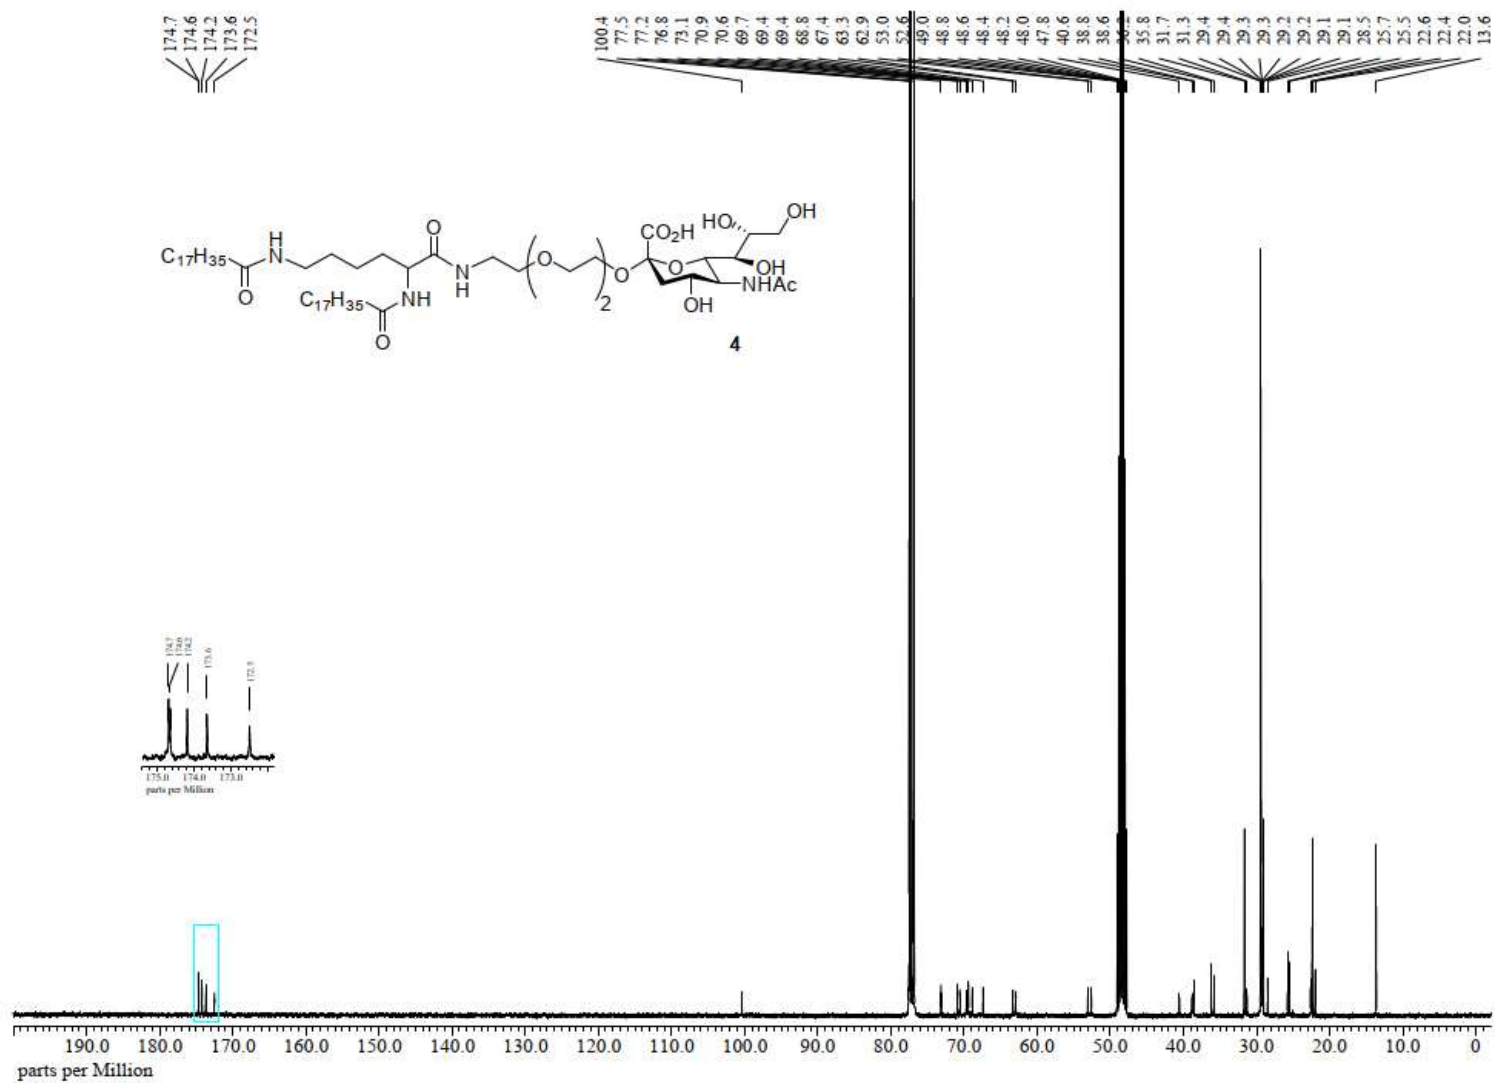

$^1\text{H}$  NMR spectrum (400 MHz,  $\text{CDCl}_3$ ) of compound **5**

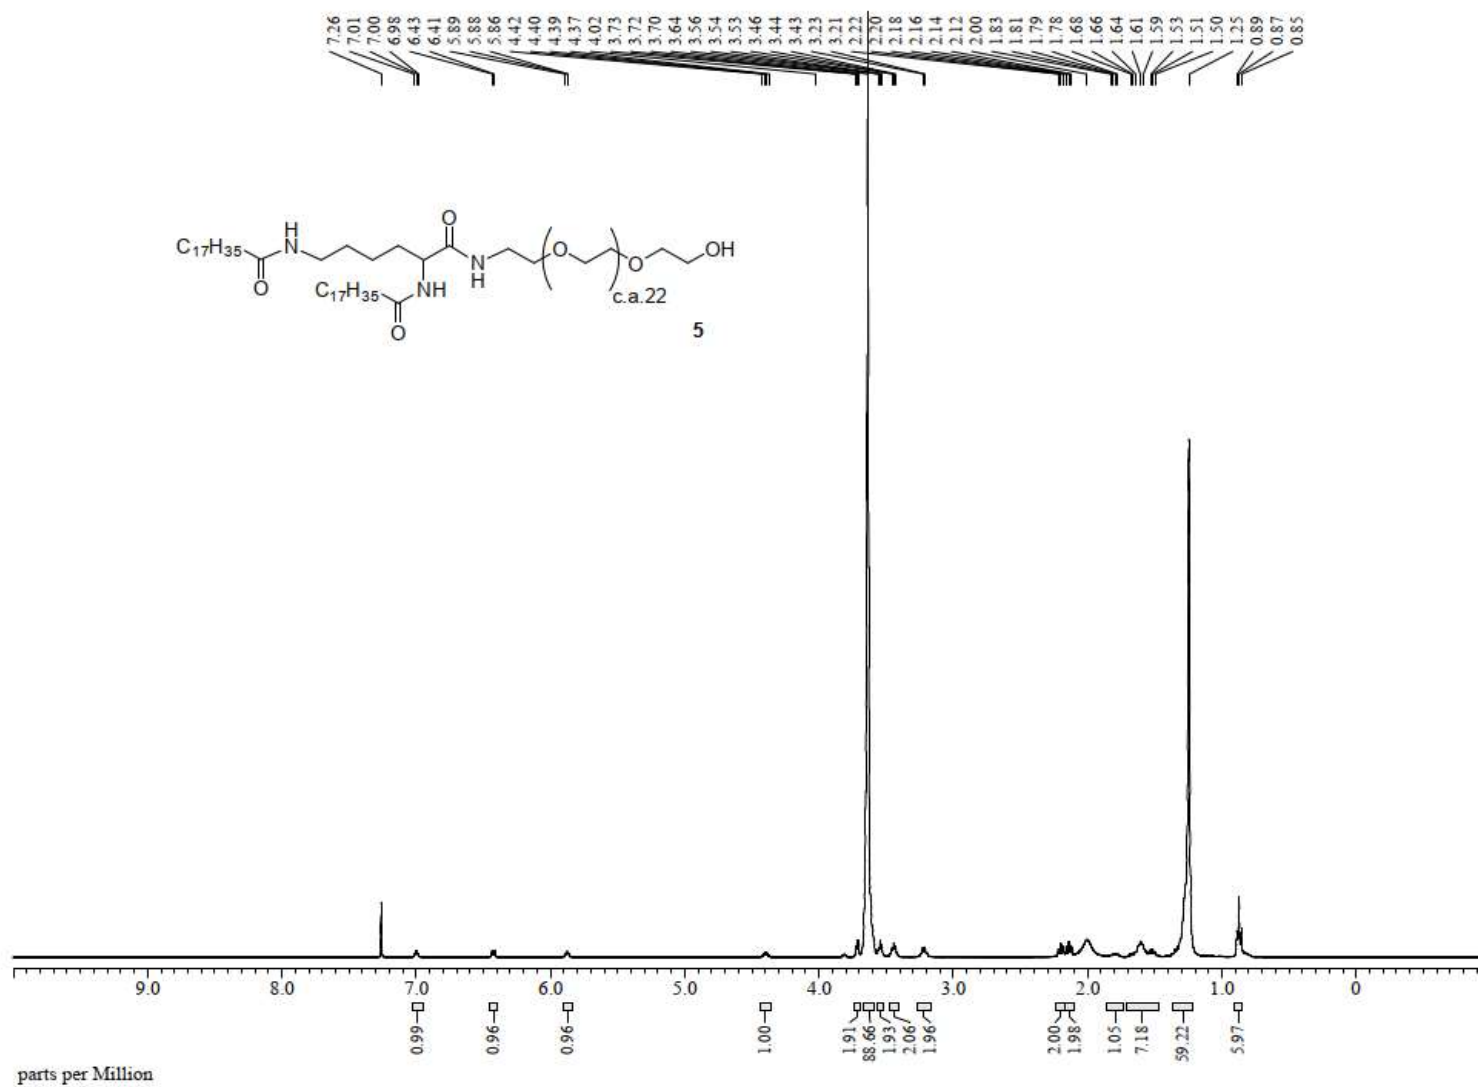

$^{13}\text{C}\{^1\text{H}\}$  NMR spectrum (101 MHz,  $\text{CDCl}_3$ ) of compound **5**

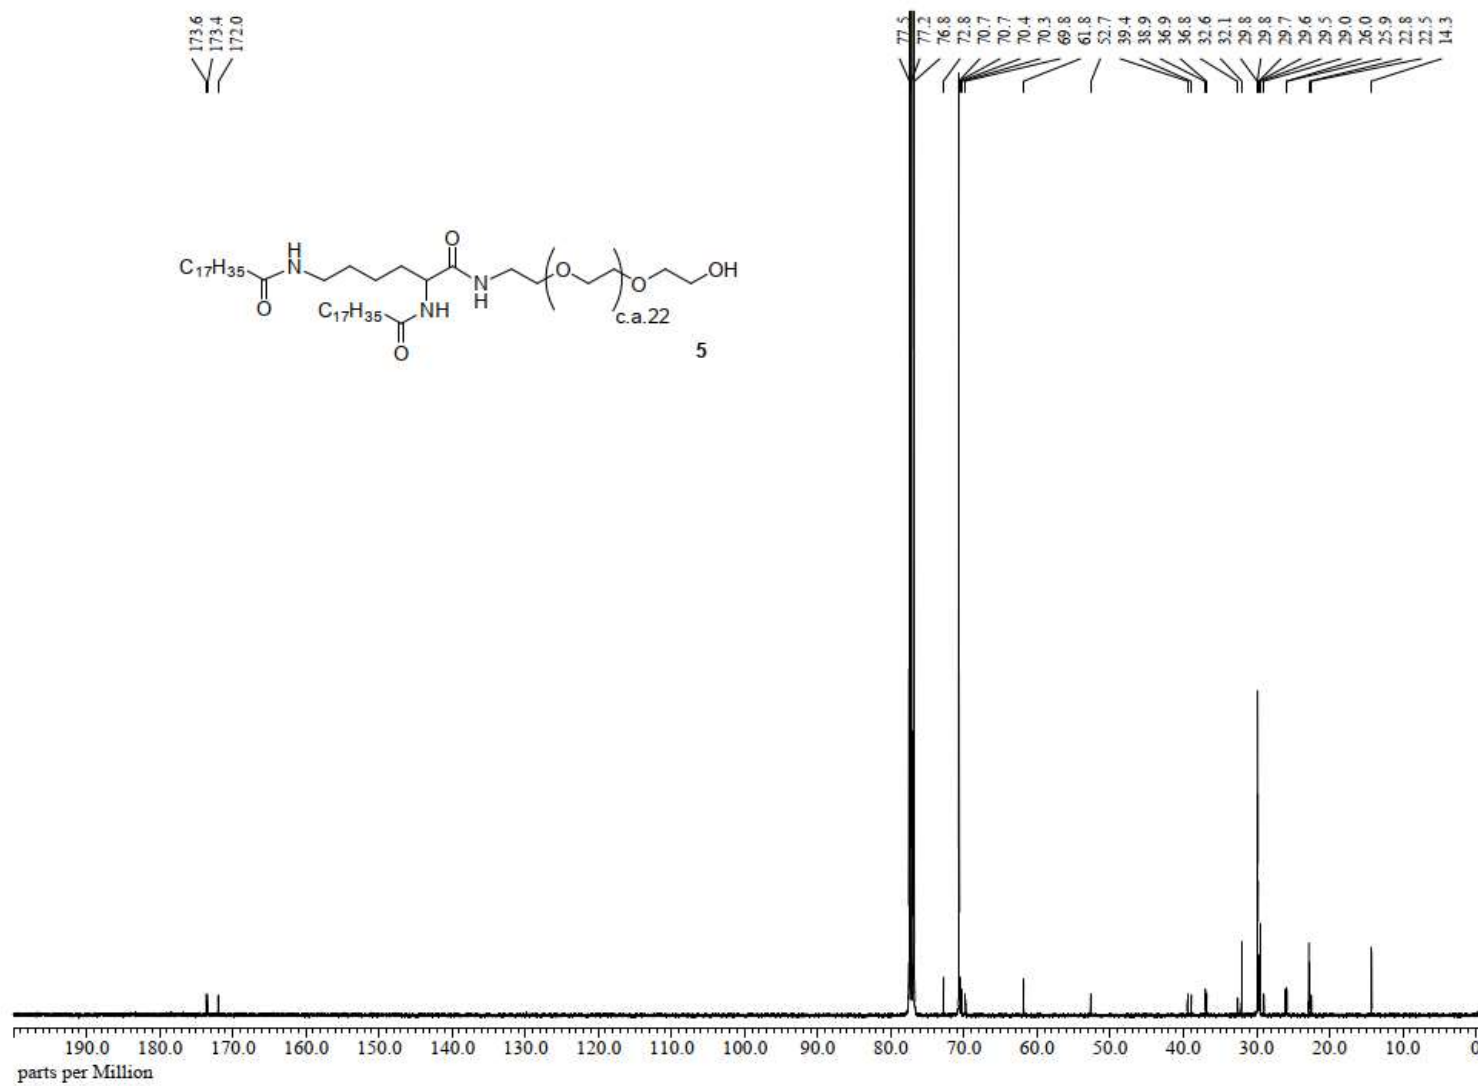

$^1\text{H}$  NMR spectrum (500 MHz,  $\text{CDCl}_3$ ) of compound **6**

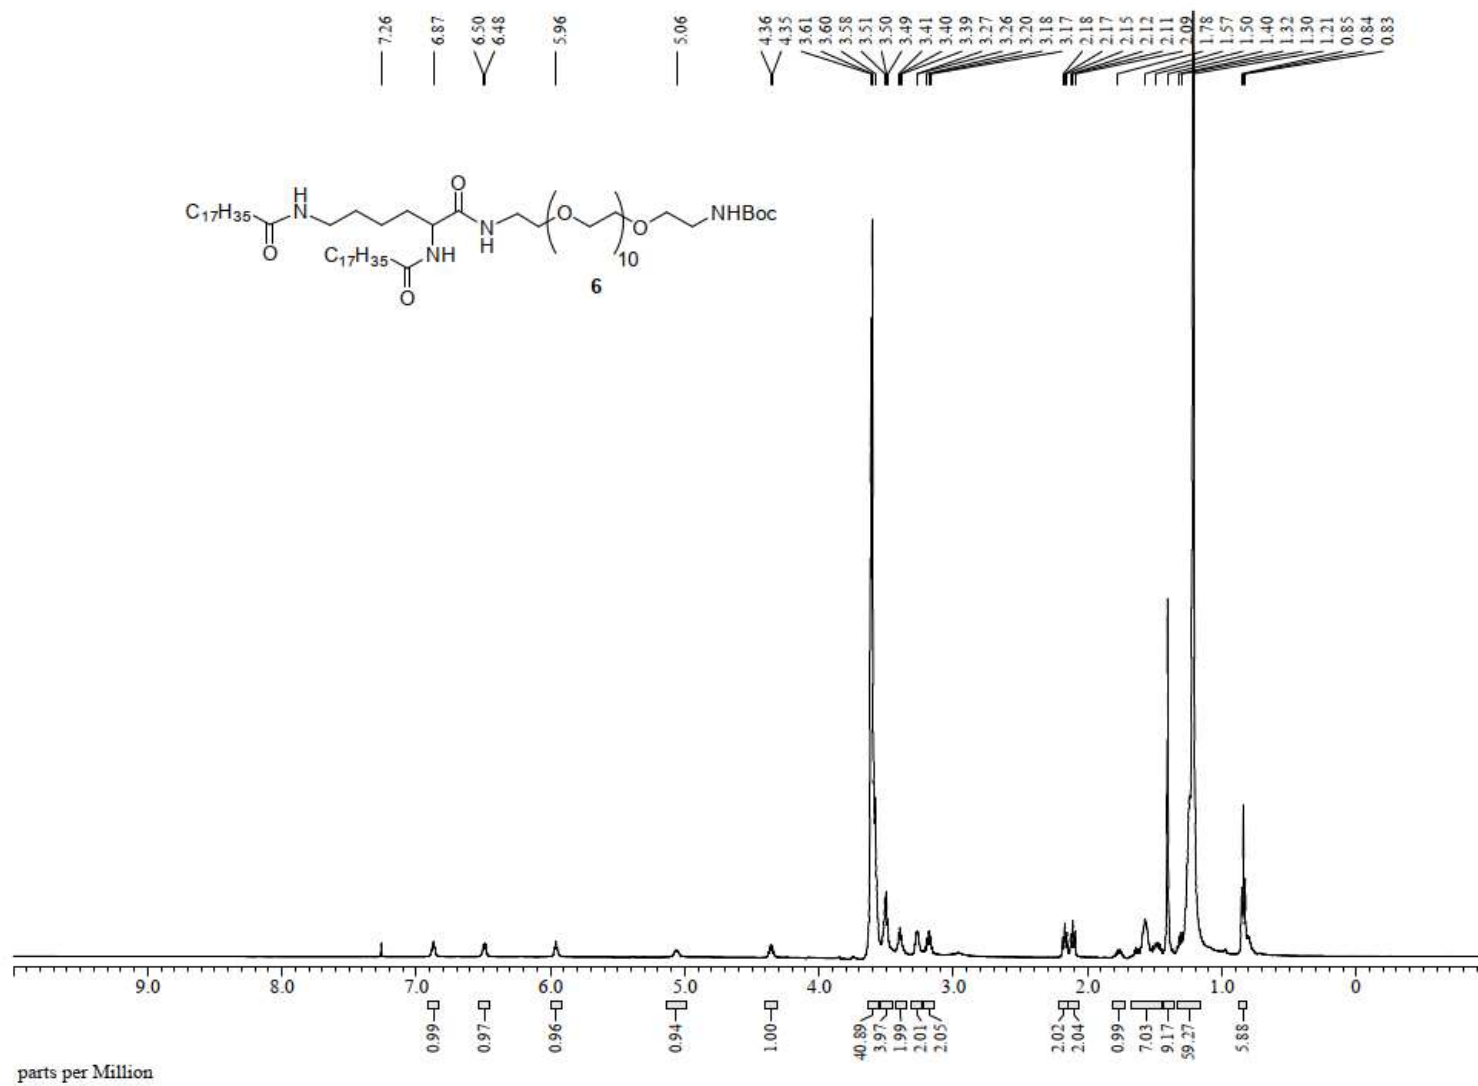

$^{13}\text{C}\{^1\text{H}\}$  NMR spectrum (125 MHz,  $\text{CDCl}_3$ ) of compound **6**

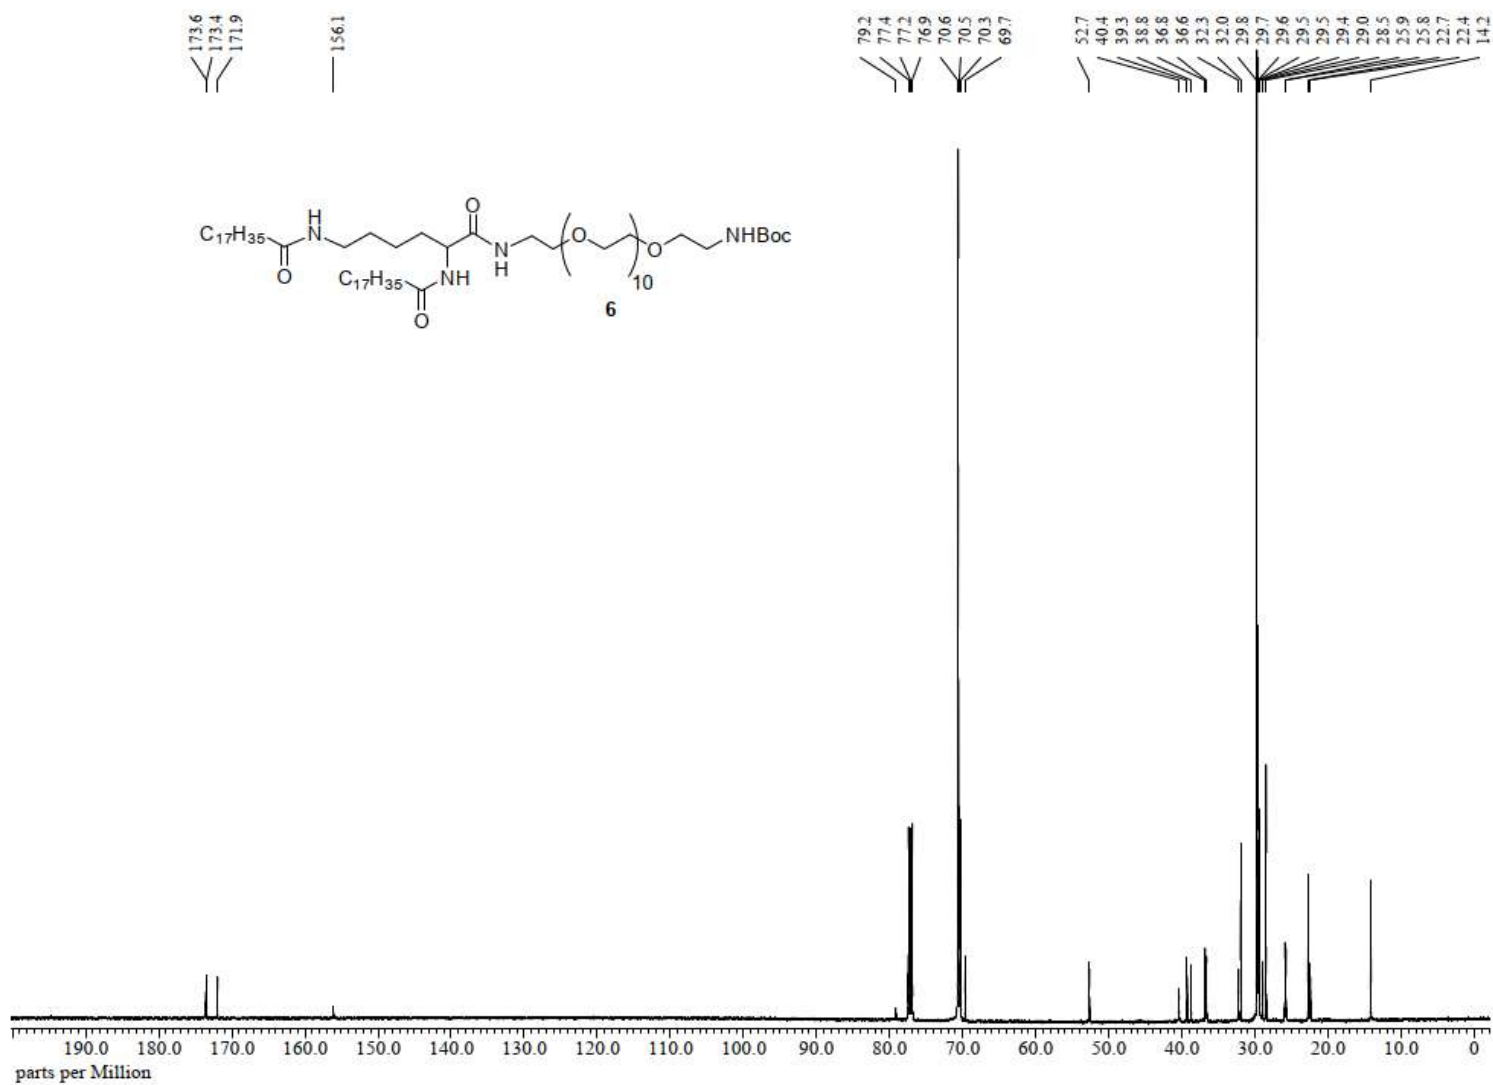

$^1\text{H}$  NMR spectrum (400 MHz,  $\text{CDCl}_3$ ) of compound **7**

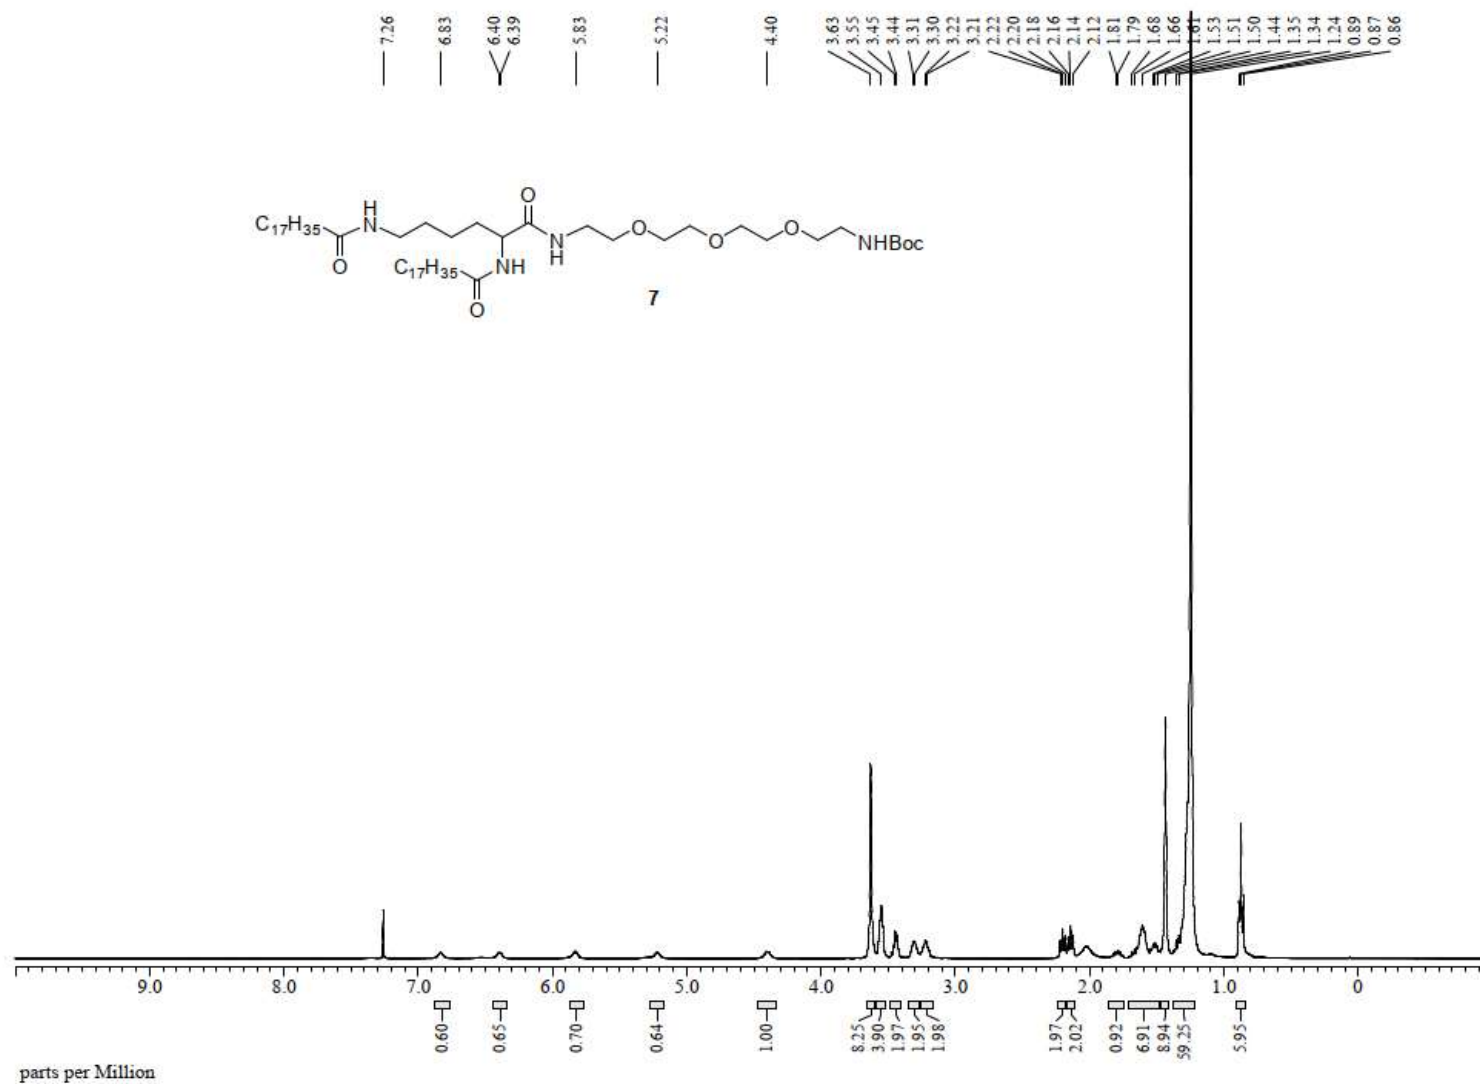

$^{13}\text{C}\{^1\text{H}\}$  NMR spectrum (101 MHz,  $\text{CDCl}_3$ ) of compound **7**

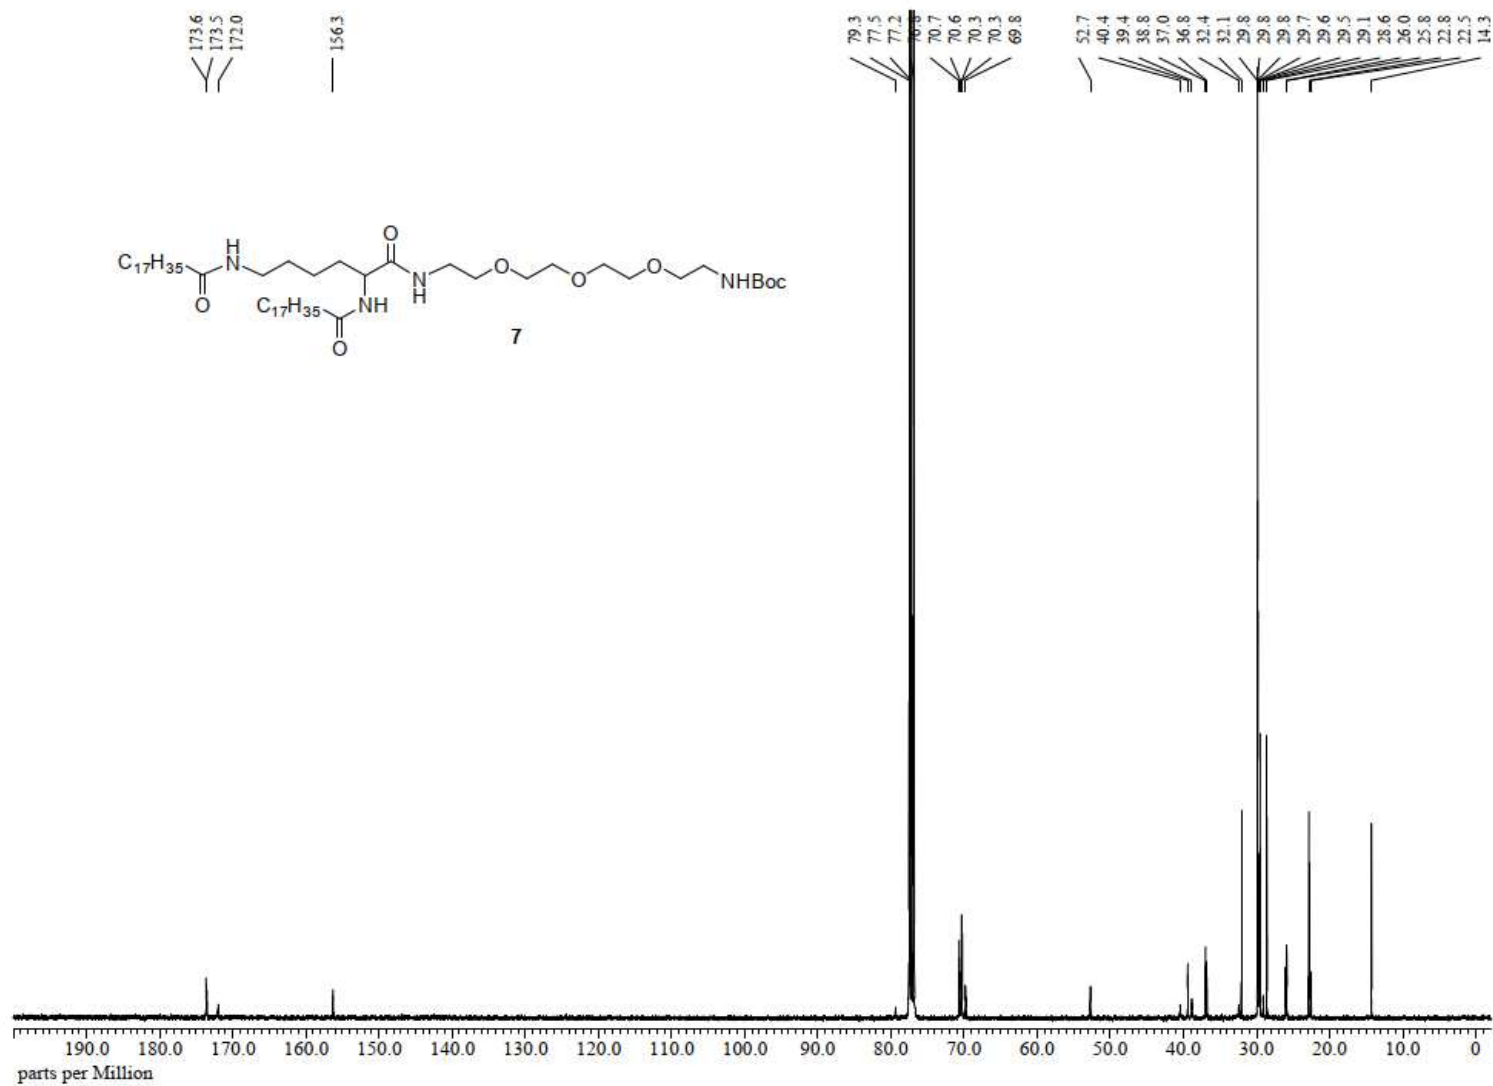

<sup>1</sup>H NMR spectrum (500 MHz, CDCl<sub>3</sub>) of compound **8**

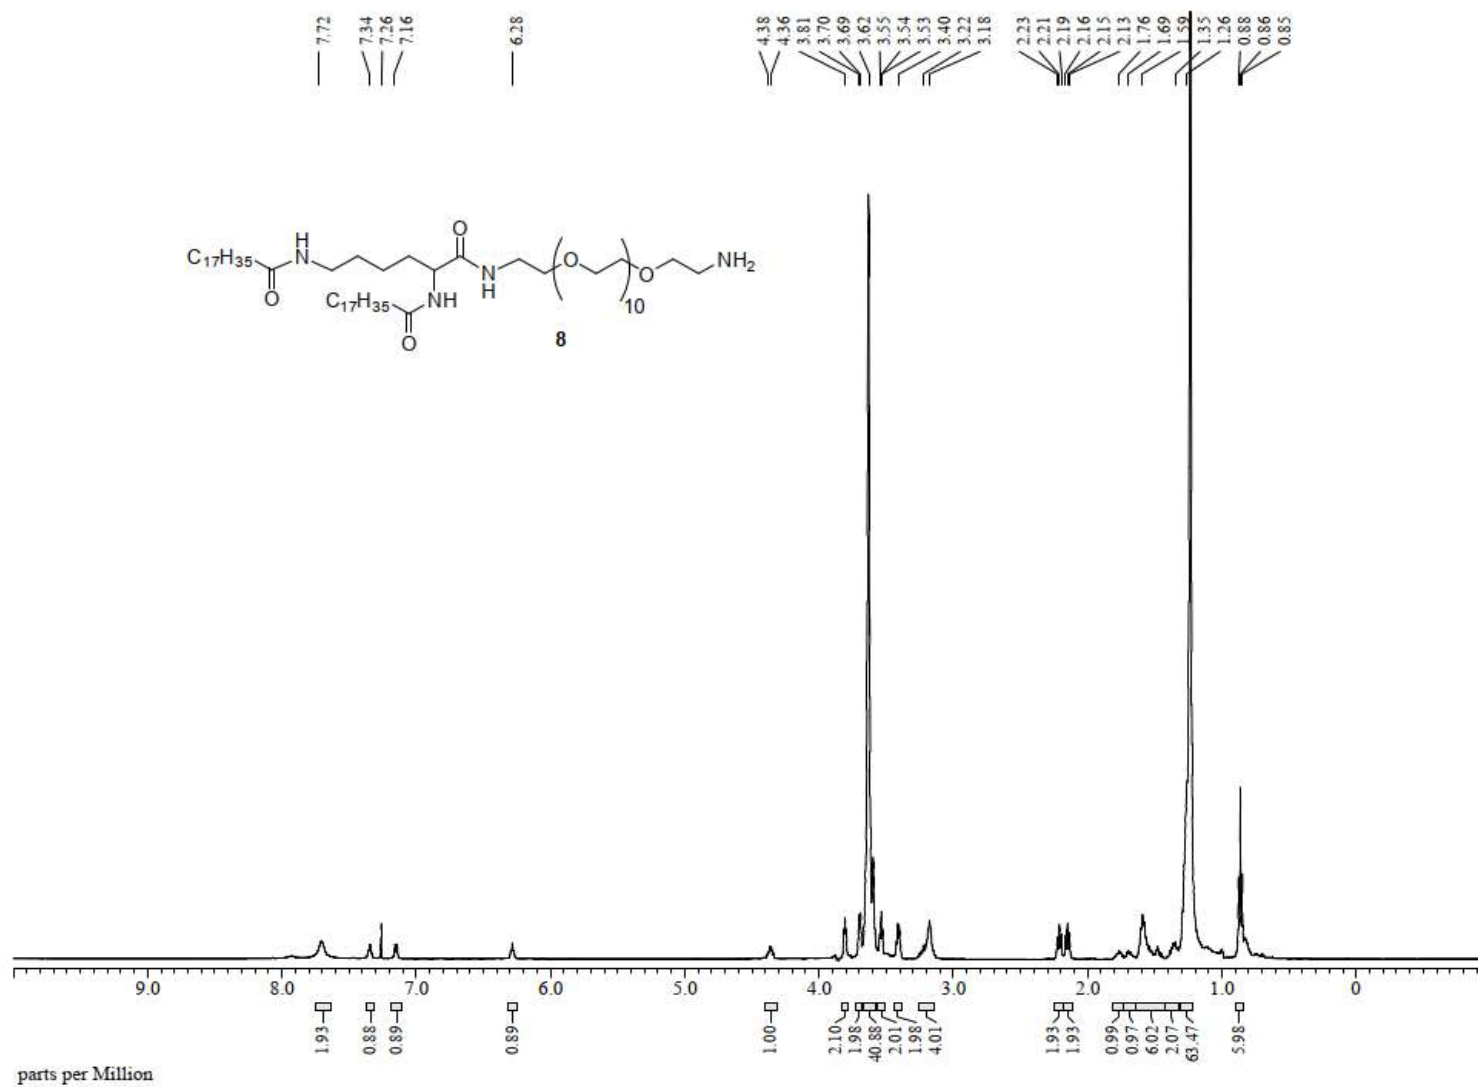



$^{13}\text{C}\{^1\text{H}\}$  NMR spectrum (125 MHz,  $\text{CDCl}_3$ ) of compound **8**

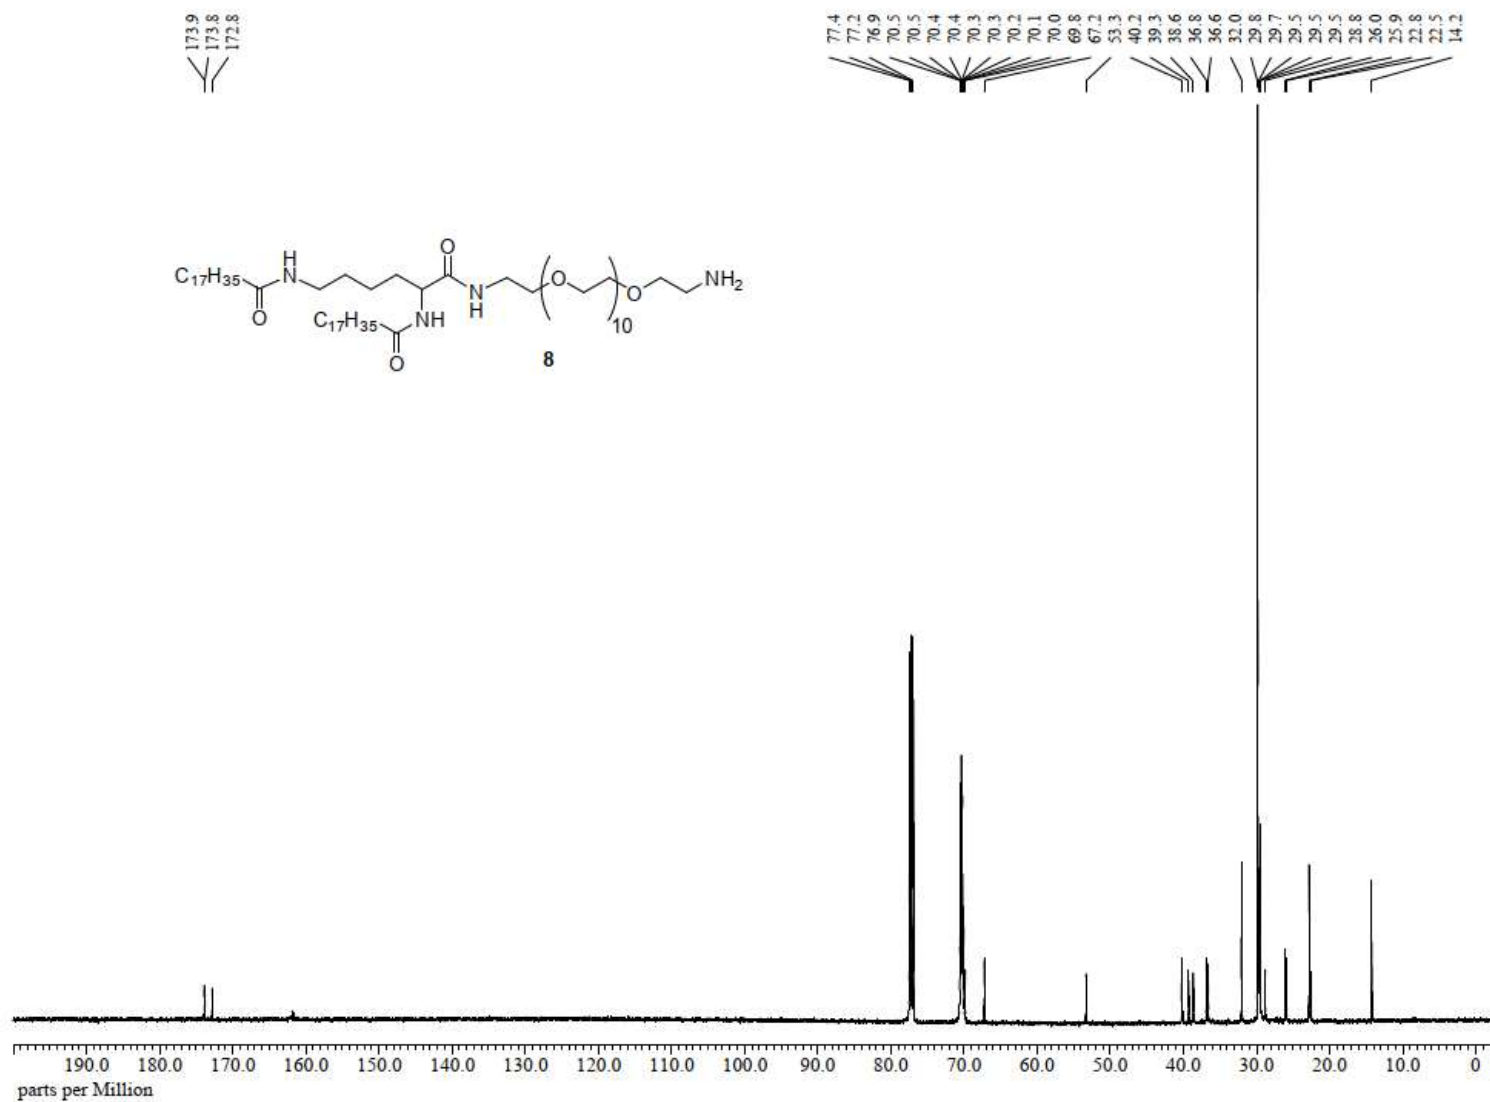

$^1\text{H}$  NMR spectrum (400 MHz,  $\text{CDCl}_3$ ) of compound **9**

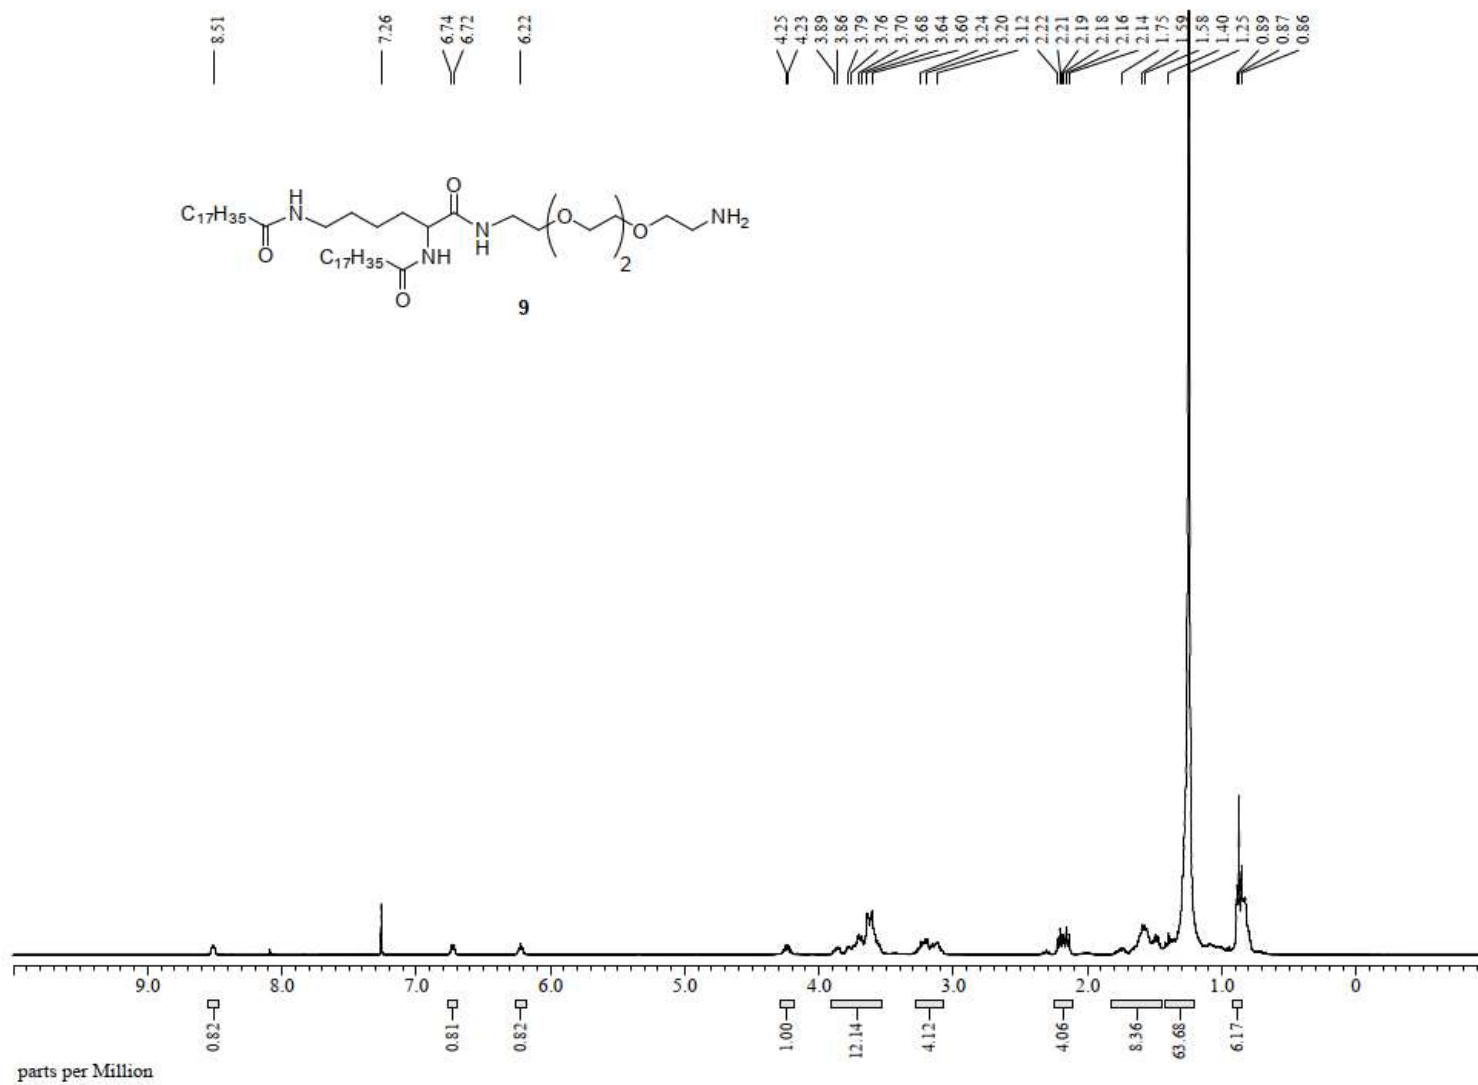

$^{13}\text{C}\{^1\text{H}\}$  NMR spectrum (101 MHz,  $\text{CDCl}_3$ ) of compound **9**

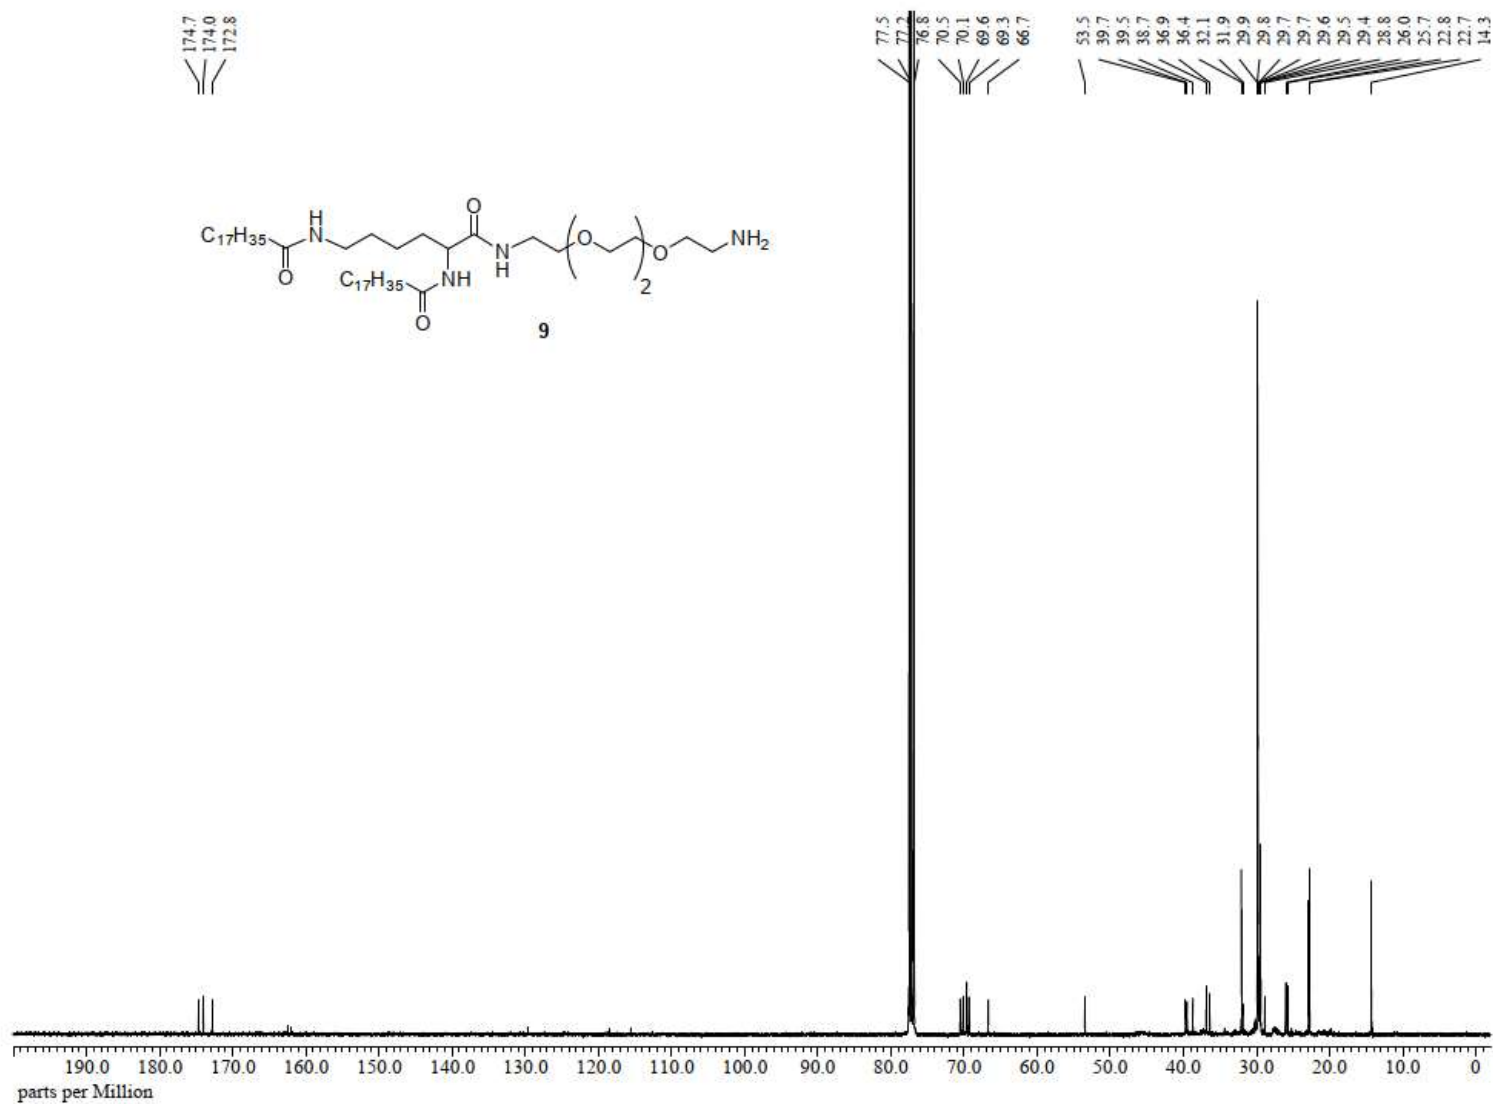

$^1\text{H}$  NMR spectrum (400 MHz, 2:1  $\text{CDCl}_3$ : $\text{CD}_3\text{OD}$ ) of compound **10**

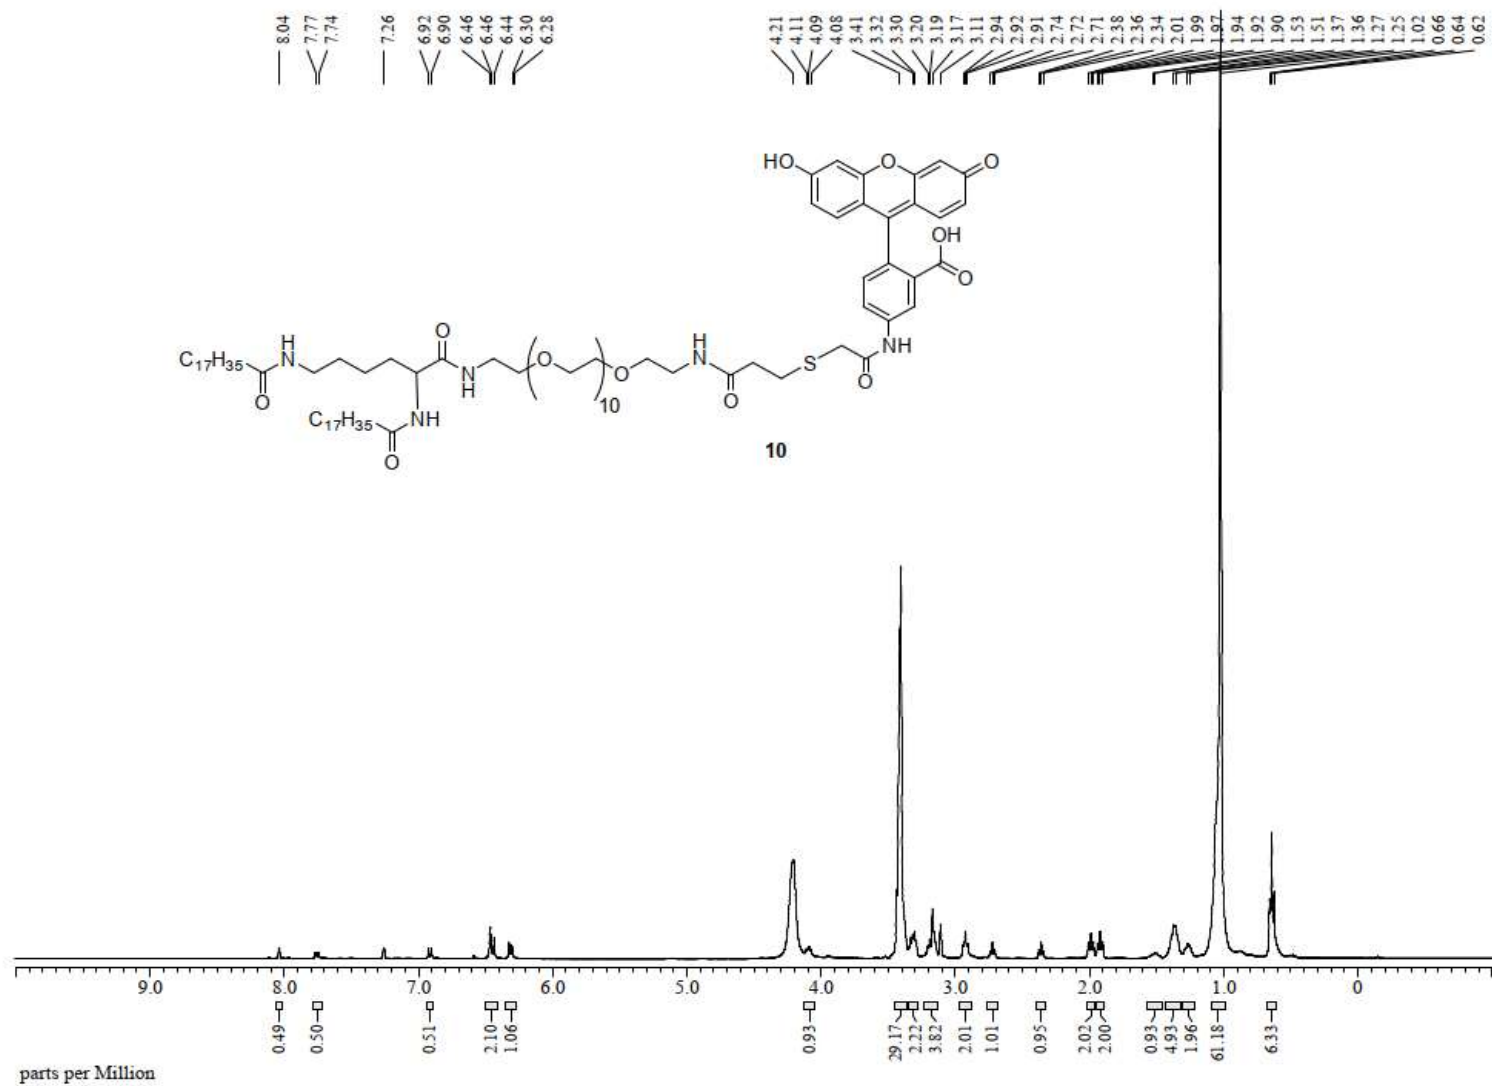

$^{13}\text{C}\{^1\text{H}\}$  NMR spectrum (101 MHz, 2:1  $\text{CDCl}_3:\text{CD}_3\text{OD}$ ) of compound **10**

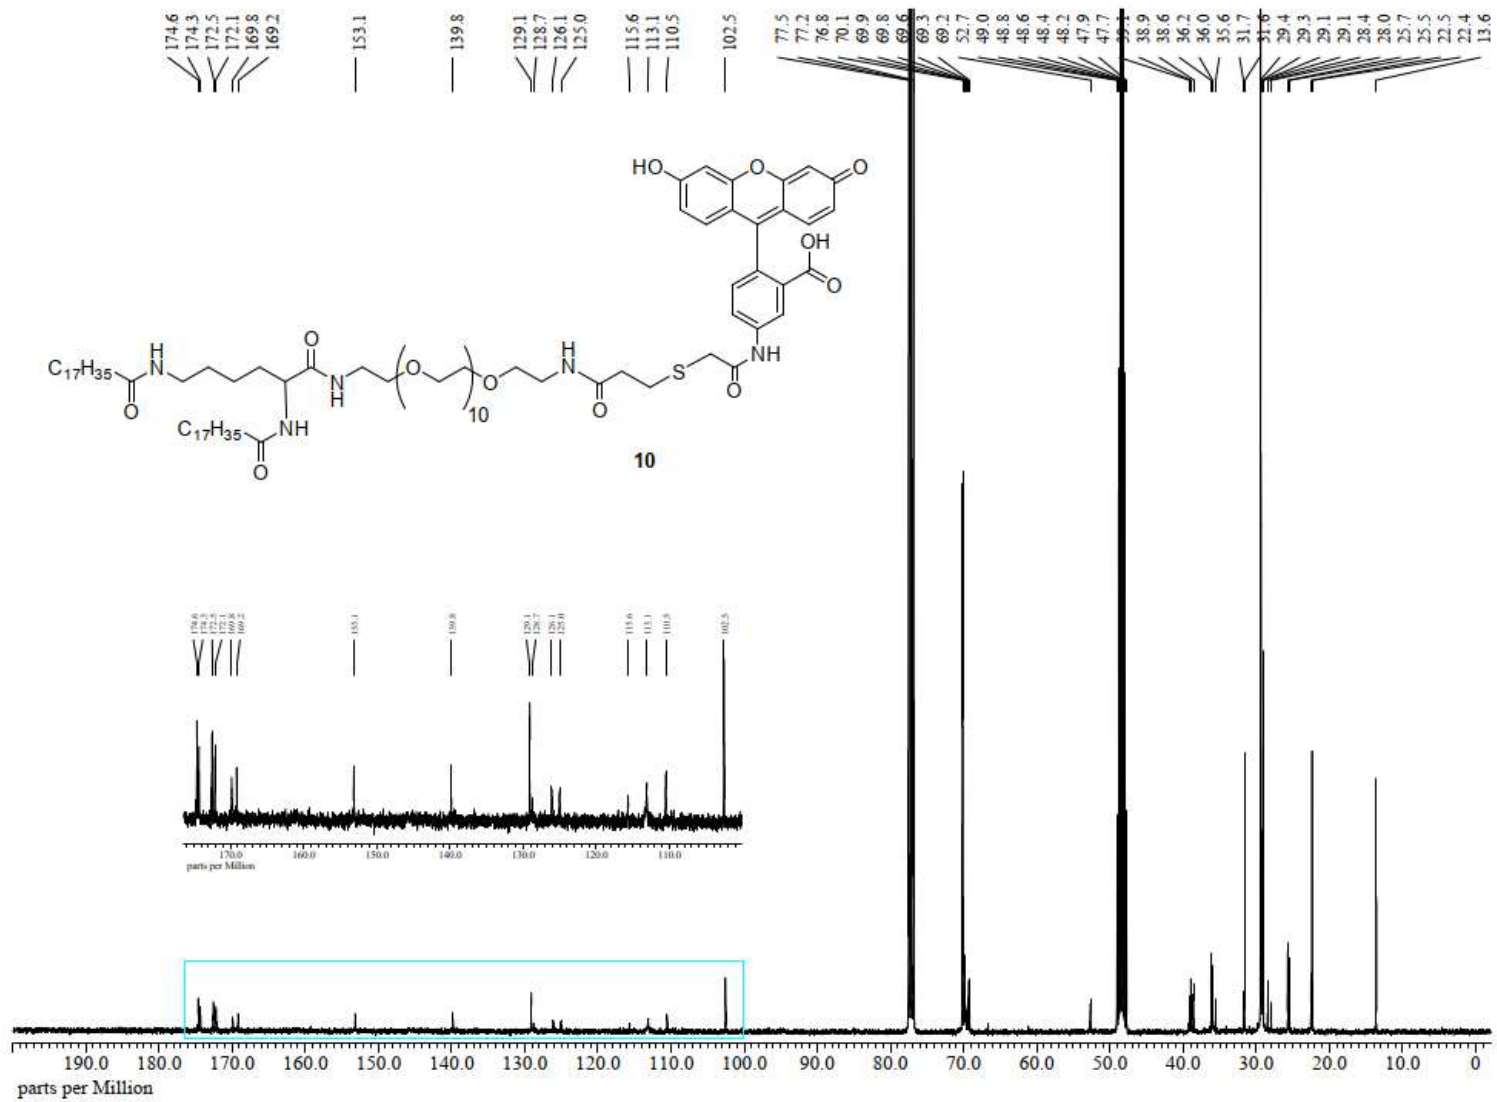

MALDI spectrum of compound 11

4700 Reflector Spec #1 MC=>TR[BP = 4061.0, 954]

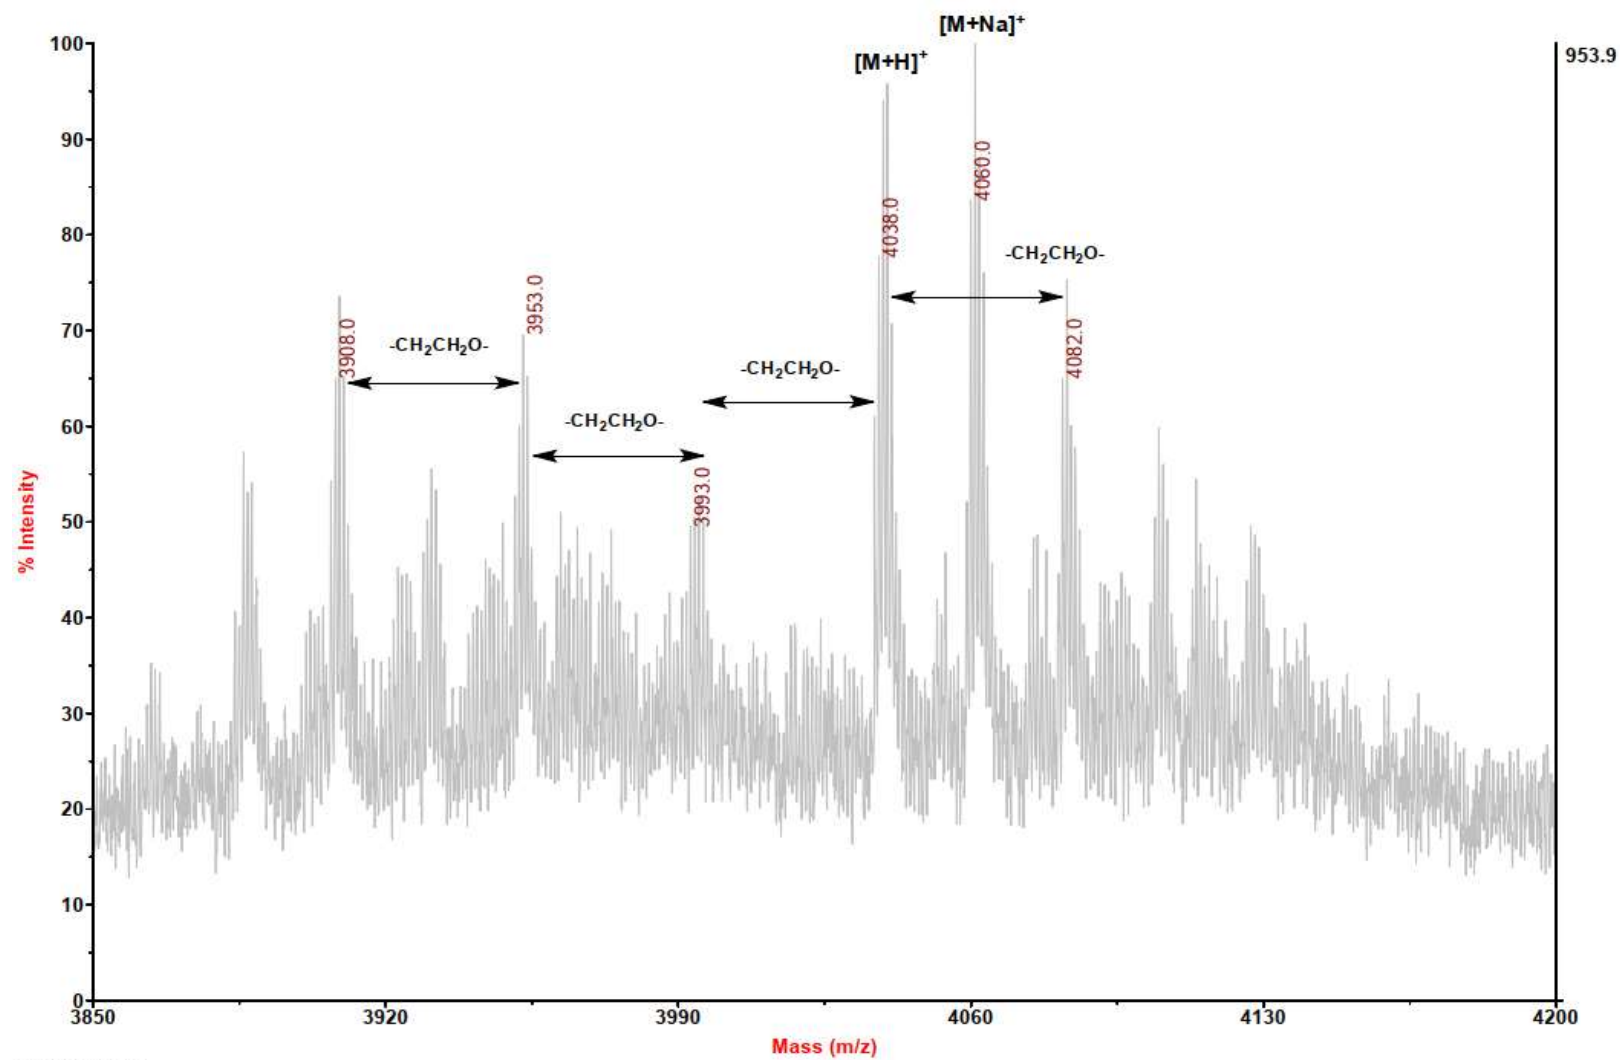

C:\...F20\_MS.t2d  
Acquired:

File Name: F20\_MS

Trace: 4700 Reflector Spec #1 MC=>TR[BP = 4061.0, 954]

| Index | Centroid Mass | Lower Bound | Upper Bound | Charge (z) | Height | Relative Intensity | Area (A) | S/N Ratio | Resolution | Isot     |
|-------|---------------|-------------|-------------|------------|--------|--------------------|----------|-----------|------------|----------|
| 1     | 3886.01001    | 3885.59     | 3886.55     | 1          | 518    | 54.28              | 3556.62  | 23.10     | 9238.01    | 6083.51  |
| 2     | 3906.94751    | 3906.56     | 3907.53     | 1          | 507    | 53.15              | 2963.22  | 43.48     | 11082.31   | 18145.47 |
| 3     | 3930.99292    | 3930.61     | 3931.62     | 1          | 516    | 54.12              | 2894.64  | 23.99     | 9847.92    | 5965.64  |
| 4     | 3950.94434    | 3950.58     | 3951.47     | 1          | 503    | 52.71              | 2732.94  | 37.33     | 11412.60   | 13955.40 |
| 5     | 3961.91602    | 3961.40     | 3962.53     | 1          | 475    | 49.84              | 3083.24  | 15.64     | 12164.92   | 3076.49  |
| 6     | 3992.96533    | 3992.59     | 3993.52     | 1          | 471    | 49.33              | 3289.38  | 26.54     | 11485.38   | 8534.96  |
| 7     | 4037.00806    | 4036.50     | 4037.60     | 1          | 550    | 57.66              | 3833.99  | 47.18     | 11685.93   | 24268.70 |
| 8     | 4059.02905    | 4058.47     | 4059.57     | 1          | 489    | 51.30              | 4344.42  | 37.79     | 9080.17    | 26333.30 |
| 9     | 4075.93799    | 4075.65     | 4076.56     | 1          | 471    | 49.39              | 2738.79  | 23.30     | 11212.25   | 5866.40  |
| 10    | 4081.97388    | 4081.56     | 4082.58     | 1          | 611    | 64.03              | 5259.56  | 36.26     | 8609.56    | 13354.75 |
| 11    | 4104.95264    | 4104.52     | 4105.58     | 1          | 558    | 58.53              | 3609.50  | 25.48     | 12473.21   | 6659.27  |
| 12    | 4113.91797    | 4113.41     | 4114.40     | 1          | 484    | 50.79              | 2819.24  | 16.44     | 13373.50   | 2684.09  |

$^1\text{H}$  NMR spectrum (500 MHz,  $\text{CDCl}_3$ ) of compound **12**

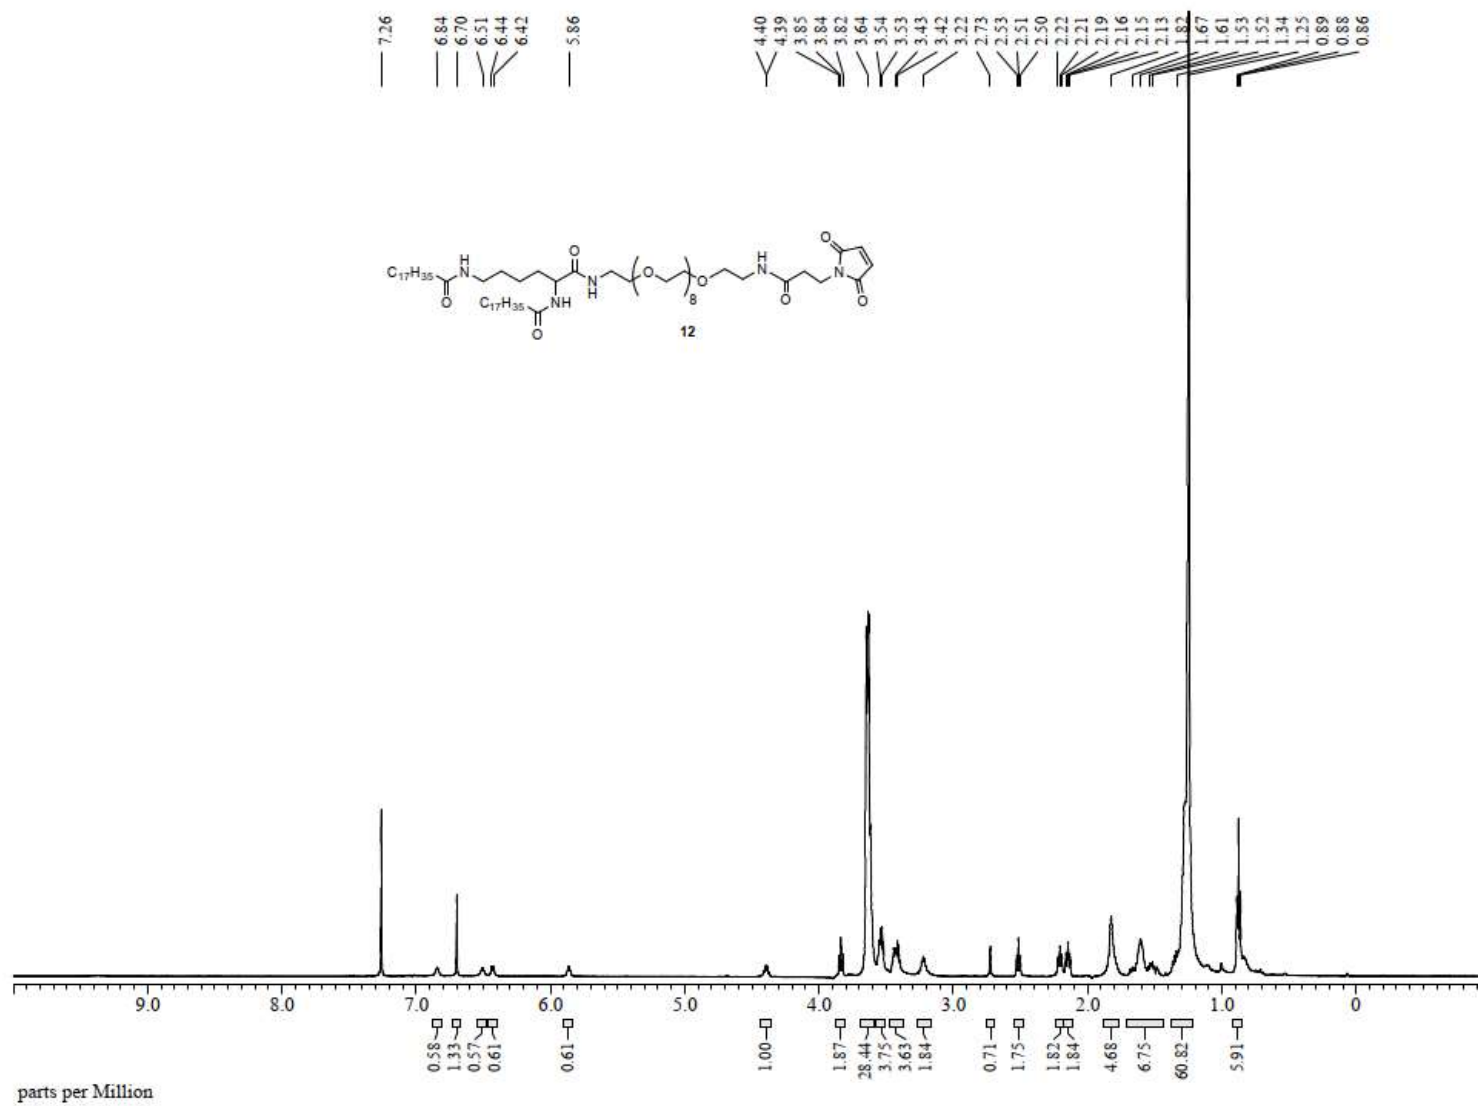



$^{13}\text{C}\{^1\text{H}\}$  NMR spectrum (125 MHz,  $\text{CDCl}_3$ ) of compound **12**

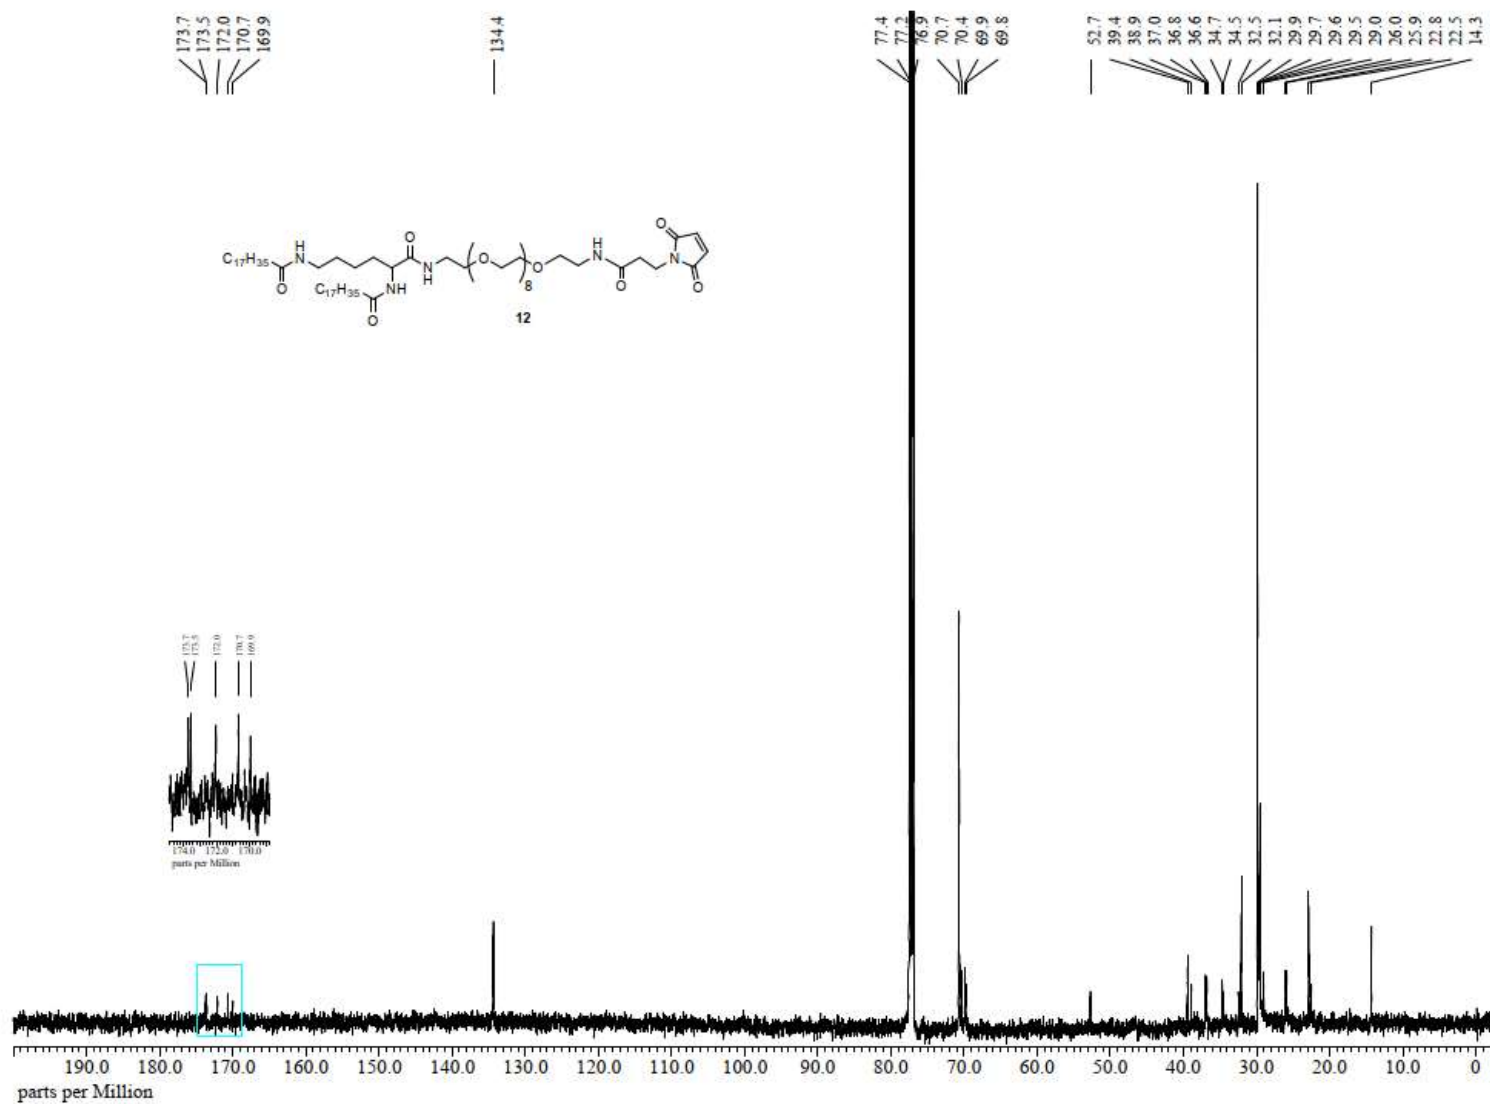

$^1\text{H}$  NMR spectrum (500 MHz, 1:1  $\text{CDCl}_3$ : $\text{CD}_3\text{OD}$ ) of compound **13**

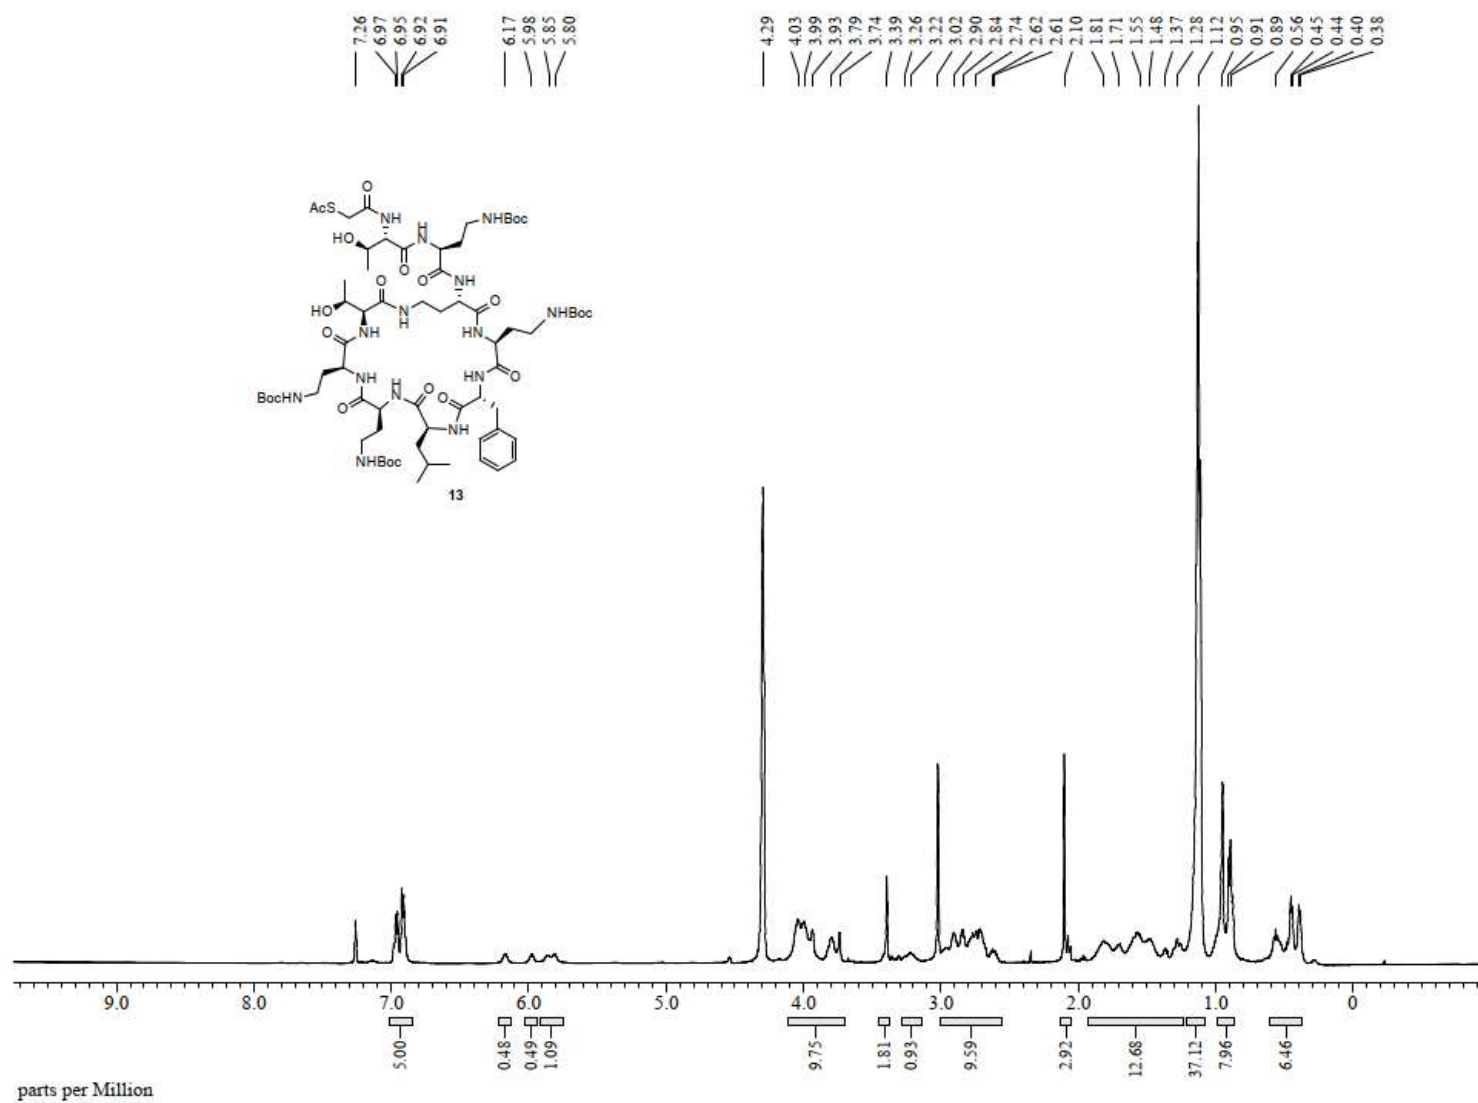

$^1\text{H}$  NMR spectrum (500 MHz,  $\text{D}_2\text{O}$ ) of compound **14**

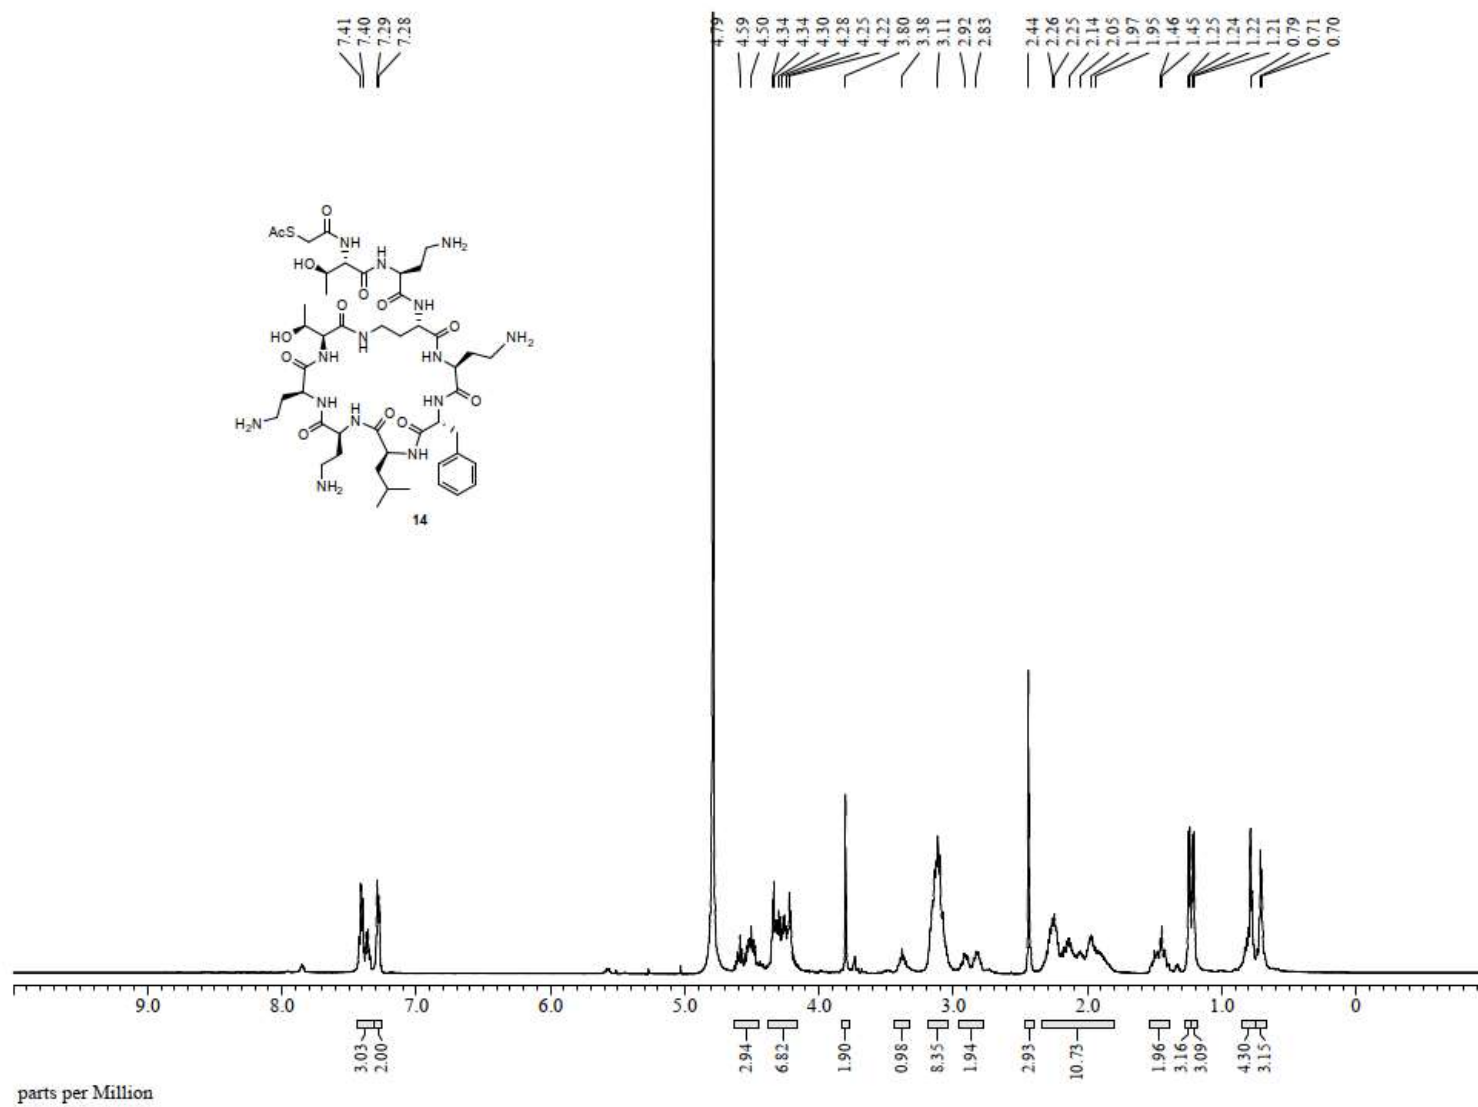

$^1\text{H}$  NMR spectrum (500 MHz,  $\text{D}_2\text{O}$ ) of compound **15**

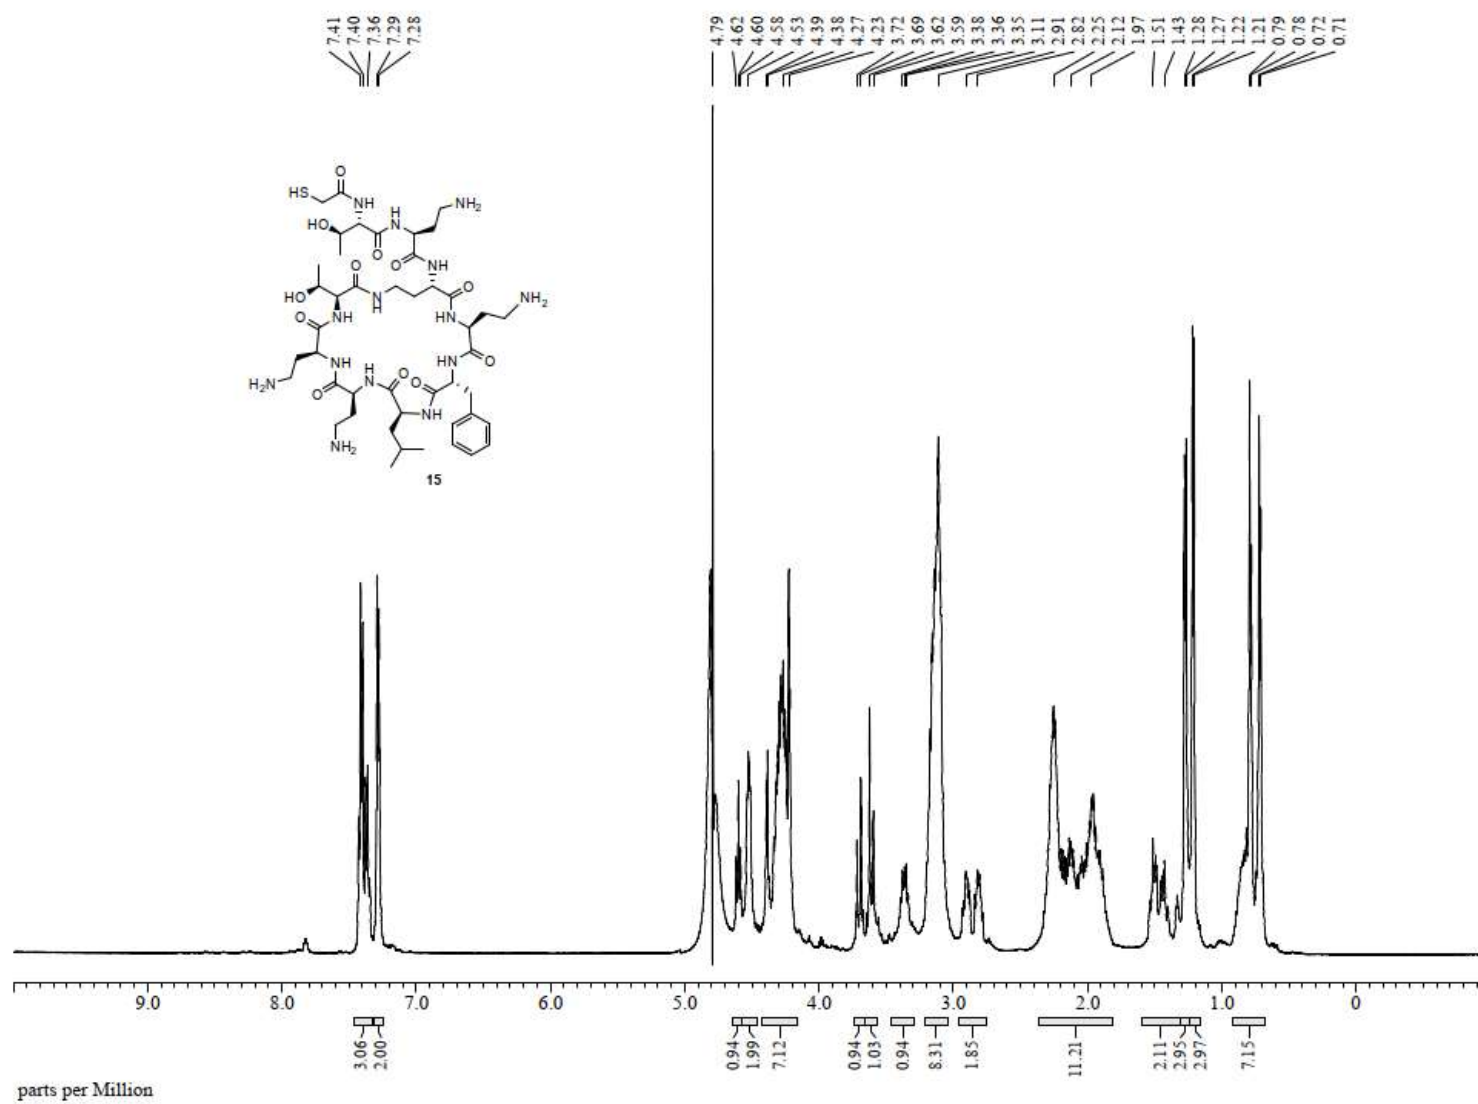

$^1\text{H}$  NMR spectrum (400 MHz, 2:1  $\text{CDCl}_3$ : $\text{CD}_3\text{OD}$ ) of compound **16**

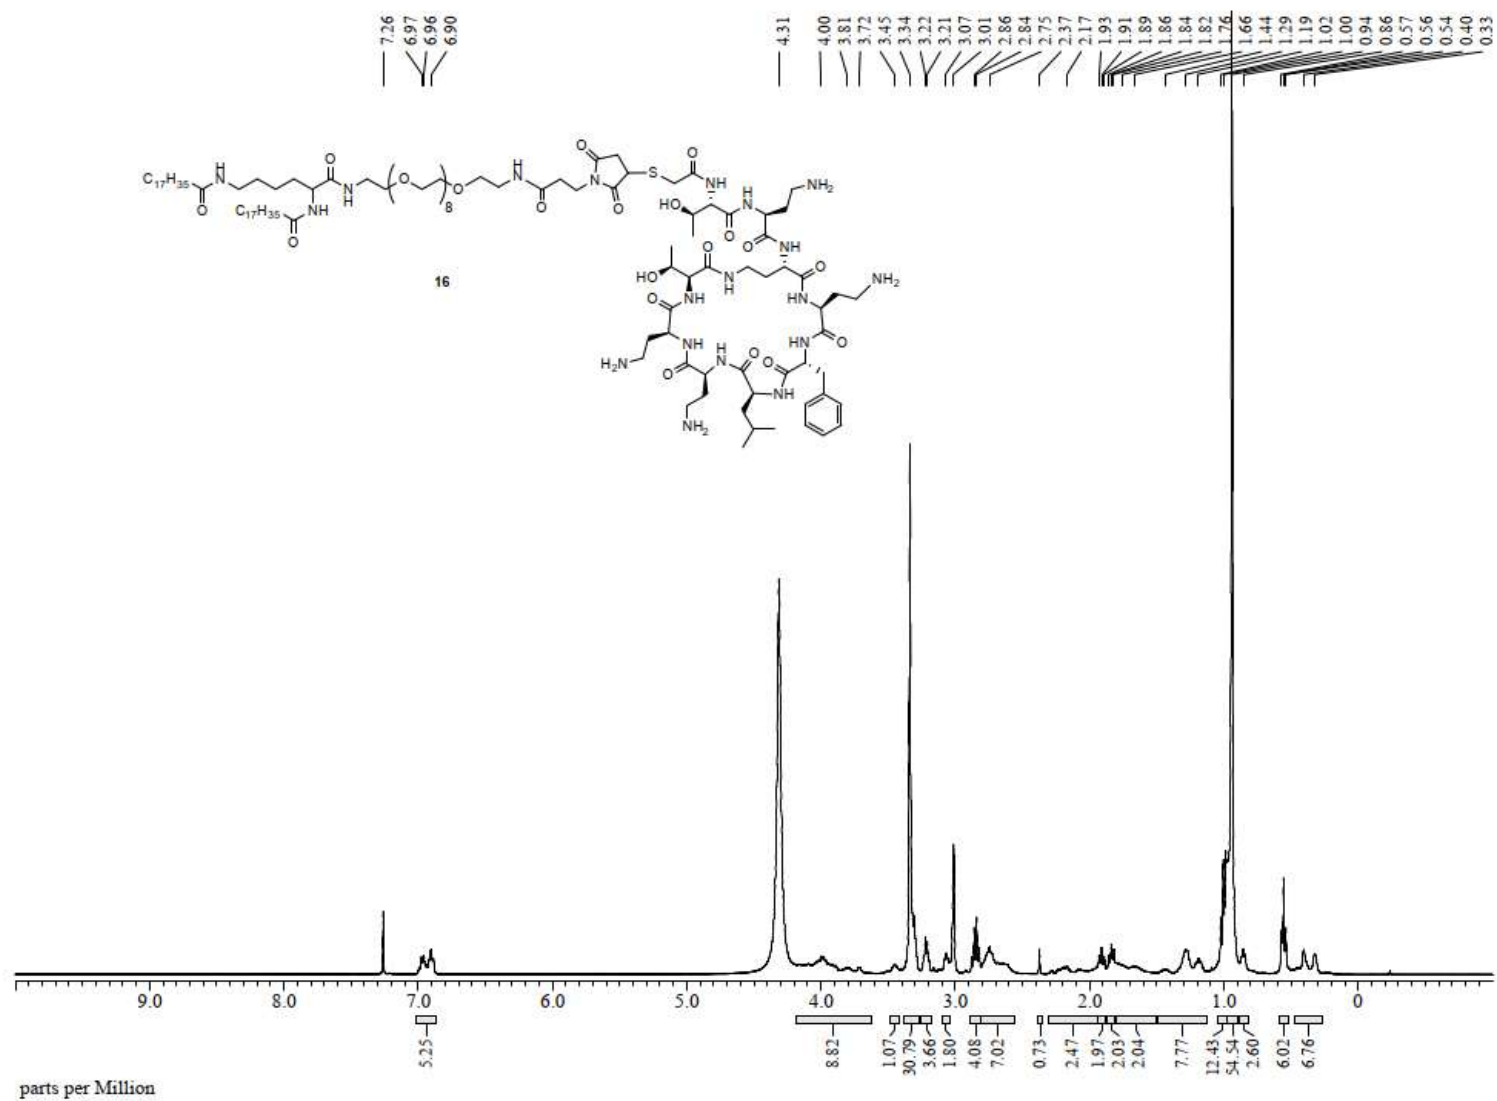

Supplement: Supplementary file 1 [file 1bd6cc41438f89c9e2326376.pdf]
